**Title:** Wearable technology to capture arm use of stroke survivors in home and community settings: feasibility and **early** insights on motor performance

**Authors:**

Marika Demers<sup>1,2</sup>, PhD, OT; Lauri Bishop<sup>2</sup>, PhD, DPT, PT; Amelia Cain<sup>2</sup>, DPT, PT; Joseph Saba<sup>2</sup>, BSc; Justin Rowe<sup>3</sup>, PhD; Daniel Zondervan<sup>3</sup>, PhD; Carolee Winstein<sup>2,4</sup>, PhD, PT

**Affiliations:**

1. School of Rehabilitation, Université de Montréal, Montreal (Qc), Canada
2. Division of Biokinesiology and Physical Therapy, Herman Ostrow School of Dentistry, University of Southern California, Los Angeles, CA, USA
3. Flint Rehabilitation Devices, Irvine (CA), USA
4. Department of Neurology, Keck School of Medicine, University of Southern California, Los Angeles, CA

**Corresponding author:**

Marika Demers, PhD, OT  
School of Rehabilitation, Université de Montréal,  
7077 Park Ave.,  
Montreal (Qc), Canada  
H3X 1N7

Address all correspondence to: [marika.demers@umontreal.ca](mailto:marika.demers@umontreal.ca)

Phone: 1-514-343-6111 #30897

## **Abstract**

*Objective:* To establish short-term feasibility and usability of wrist-worn wearable sensors to capture arm/hand activity of stroke survivors and to explore **the association between** factors related to use of the paretic arm/hand.

*Methods:* 30 chronic stroke survivors were monitored with wrist-worn wearable sensors during 12h/day for a 7-day period. Participants also completed standardized assessments to capture stroke severity, arm motor impairments, self-perceived arm use and self-efficacy. Usability of the wearable sensors was assessed using the adapted System Usability Scale and an exit interview. Associations between motor performance and capacity (arm/hand impairments and activity limitations) were assessed using Spearman's correlations.

*Results:* Minimal technical issues or lack of adherence to the wearing schedule occurred, with 87.6% of days procuring valid data from both sensors. Average sensor wear time was 12.6 (standard deviation: 0.2) h/day. Three participants experienced discomfort with one of the wristbands and three other participants had unrelated adverse events. There were positive self-reported usability scores (mean: 85.4/100) and high user satisfaction. Significant correlations were observed for measures of motor capacity and self-efficacy with paretic arm use in the home and the community (Spearman's correlation  $\rho$ s: 0.44-0.71).

*Conclusions:* This work demonstrates the feasibility and usability of a consumer-grade wearable sensor to capture paretic arm activity outside the laboratory. It provides early insight into stroke survivors' everyday arm use and related factors such as motor capacity and self-efficacy.

*Impact:* The integration of wearable technologies into clinical practice offers new possibilities to complement in-person clinical assessments and to better understand how each person is moving outside of therapy and throughout the recovery and reintegration phase. Insights gained from monitoring stroke survivors arm/hand use in the home and community is the first step towards informing future research with an emphasis on causal mechanisms with clinical relevance.

**Key words:** upper extremity, rehabilitation, stroke, wearable electronic devices, motor skills, motor activity, self-efficacy

## Main manuscript

### 1. Background

Arm impairments are highly prevalent after stroke (up to 80%)<sup>1</sup> and can impact one's ability to complete activities of daily living and consequently contribute to reductions in community participation and quality of life.<sup>2,3</sup> The transfer of skills gained in the therapy context to real-life situations remains a challenge for stroke rehabilitation. Consistent with the terminology of the International Classification of Functioning,<sup>4</sup> the activity domain can be separated into the capacity for activity (i.e., what one can do; assessed by standardized tests in structured settings) versus performance in daily activities (i.e. what one does in the home/community). For example, persistent difficulty with hand movements or reduced hand use in daily activities were reported in 71% of stroke survivors with full arm motor function recovery measured by the Fugl-Meyer Assessment.<sup>5</sup> Similarly, a recent longitudinal study showed that 59% of stroke survivors that received outpatient rehabilitation care improved capacity for activity but not performance in daily activities.<sup>6</sup> This disparity highlights the need to capture arm use outside clinical settings to gain more insights into real-life motor performance.

Knowledge of spontaneous motor performance can help clinicians plan effective and efficient rehabilitation interventions, thereby maximizing the potential for lasting functional gains.<sup>7</sup> However, clinical assessments are traditionally done in highly-structured environments, which may not accurately reflect the behaviors exhibited in the natural environment with all its unpredictable and changing characteristics.<sup>8,9</sup> Wearable technology offers new means of data acquisition in ecologically relevant environments to potentially inform stroke rehabilitation.<sup>10</sup> It can also be used as an intervention modality to encourage health-promoting behaviors that may reduce disability in stroke survivors.<sup>11</sup> Longitudinal monitoring and promotion of paretic arm/hand use informed through wearable technology may be key to encourage a virtuous cycle of arm use and promote self-rehabilitation in the community.<sup>12</sup> Previous work demonstrated that research-grade wrist-worn wearable sensors are a valid and reliable means to capture arm/hand use in stroke survivors<sup>13,14</sup> and to distinguish between paretic and less-affected arms.<sup>15</sup> However, research-grade sensors have many limitations for clinical use: data needs to be processed offline, the key output, i.e., activity count, may be difficult to interpret, and most systems are expensive and not user-friendly.<sup>11,16,17</sup> Requirements such as user-friendliness, robustness, and ability for online data processing are crucial for clinical adoption.<sup>18</sup> Currently, there is a plethora of commercially available consumer-grade devices to capture physical activity behavior, yet, limited options exist to accurately capture arm/hand movement of stroke survivor with a wide range of motor impairments.<sup>11,17,19</sup> The consumer-grade MiGo system (Flint Rehabilitation Devices, Irvine, CA) was developed to monitor the activity (i.e., arm/hand use and mobility) of stroke survivors in their homes and communities, and to address some of the limitations of existing technologies. Our previous work supported the accuracy of MiGo to capture time in active movement for each arm in a laboratory setting in chronic stroke survivors.<sup>20</sup> However, feasibility and usability in the natural setting is necessary to **ultimately** translate the use of wearable technologies into meaningful therapeutic tools.

Wearable technology in combination with clinical measures provides valuable data to better understand how each person is moving outside of therapy and throughout the recovery and reintegration phase. We must examine not only a stroke survivors' paretic arm use which can be captured through wearable technology, but also how these data supplement and relate to lab- or clinic-based assessments. Ultimately, with future research, this combination of data may help us better understand why improvements in motor capacity in some people do not necessarily translate to better performance in daily activities, while in others they do. This understanding has the potential to provide valuable insights for the development of new treatments to promote functional recovery.<sup>21</sup>

This project aims to 1) establish short-term feasibility and usability of wrist-worn wearable sensors to capture arm/hand movement behavior in the unsupervised home/community environment, in chronic stroke survivors, and 2) demonstrate the clinical relevance of wearable sensors through exploring the associations between paretic arm/hand use and both motor capacity and self-efficacy in the natural environment. For objective 1, feasibility is assessed using four metrics: 1) adherence, 2) technical issues and malfunction, 3) safety and comfort, and 4) acceptance and satisfaction. Our milestones are to achieve no severe adverse events, >80.0% of days with valid data collected from both sensors, positive self-reported usability scores (>70.0%)<sup>22</sup> and user's satisfaction. For objective 2, we hypothesize that paretic arm use (i.e., motor performance) will be **associated with** measures of motor capacity and self-efficacy. We expect that self-reported measures of arm use may have a weaker relationship with sensor-based measures of motor performance, as self-reported measures are known to vary greatly with direct measures of activity.<sup>23-25</sup>

## 2. Methods

### 2.1. Design:

This study used an observational study design (as part of a larger study) to examine both the feasibility of wearable sensors to capture arm/hand use and locomotor behavior and also the feedback preferences of stroke survivors. Only the feasibility for monitoring arm/hand use is reported here.

### 2.2. Participants:

Participants were included if they had an ischemic or hemorrhagic stroke, were aged >18 years old, lived at home and were able to communicate in English. Exclusion criteria were: unilateral spatial neglect (positive score on 2/3 screening measures<sup>26</sup>), assistance for ambulation, severe cognitive or language impairments, or other medical condition that can interfere with participation. We purposefully recruited participants with a broad range of motor impairments and included participants with mild-moderate aphasia to better generalize our results. We initially recruited participants who took part in our previous validity study<sup>20</sup> and recruited additional participants using the IRB-approved Registry for Healthy Aging Database to reach our *a priori* target sample size of 30 participants. All participants were fully informed of the procedures involved and provided informed consent. The study complies with the Declaration of Helsinki. Study procedures were approved by the IRB at the University of Southern California (HS 20-00015).

### 2.3. *Wearable sensor:*

Participants wore the MiGo activity watch on each wrist to capture arm movements. MiGo is a six degrees of freedom inertial measurement unit equipped with an adjustable silicone wristband and a Bluetooth radio. Accelerometer data were analyzed using a custom built-in active time counter algorithm.<sup>16</sup> Each watch logged their respective data to a persistent block of flash memory. While MiGo has a screen that can display feedback metrics, this information was disabled to remove the bias of providing feedback. Participants were sent home with a cellular gateway (Tenovi Health, Irvine, CA). Every three hours, the gateway scanned for the sensors, connected to them, read, and relayed their logs to a HIPAA compliant server.

### 2.4. *Procedures:*

Participants took part in two in-lab visits and were monitored at home for seven days. During Visit 1, participants completed a battery of standardized assessments. Information on how to wear and charge the sensors were provided. Participants were instructed to wear the sensors for 12h each day, continue their typical activities, and charge the sensors each night. Since the activity watches are not waterproof, we asked participants to remove the sensors for showering, bathing, or swimming. For the less-affected arm, the silicone band was replaced by an elastic band to facilitate donning/doffing. A power supply was provided, and each participant was given a 'Tips' sheet with reminders for daily wear, sensor care, and precautions (see Supplementary material). The research team connected daily to a remote monitoring website to monitor adherence and identify any system malfunction. Participants were contacted after an initial 48hs and/or when data were missing to resolve technical issues or answer questions.

Equipment was returned during Visit 2. Participants completed three surveys on usability, self-efficacy, and perceived arm/hand use. Afterwards, a summary of their motor performance over the monitoring period was offered. Experience with the sensors, adverse events and technical issues reported were captured using a semi-structured interview (audio-recorded). The interview followed a detailed interview guide (see Supplementary material) about experience with the wearable sensors, feedback preferences and factors influencing behavior and recovery.

### 2.5. *Outcome measures:*

#### 2.5.1. *Clinical measures:*

Standardized assessments were used to characterize cognitive function (Montreal Cognitive Assessment),<sup>27</sup> stroke severity (National Institutes of Health Stroke Scale),<sup>28</sup> and handedness (Edinburgh Handedness Inventory).<sup>29</sup> At Visit 1, the upper extremity Fugl-Meyer Assessment (FMA-UE),<sup>30</sup> the Chedoke Arm and Hand Activity Inventory-7 (CAHAI),<sup>31</sup> and the Rating of Everyday Arm-use in the Community and Home<sup>32</sup> were administered to capture arm/hand motor impairments, activity limitations and perceived use, respectively. At Visit 2, the adapted Systems Usability Scale (SUS; usability),<sup>33</sup> the Motor Activity Log-14 (self-perceived arm/hand function)<sup>34</sup> and the Confidence in Arm and Hand Movement (self-efficacy)<sup>35</sup> were collected.

Data were entered in the REDCap platform (Vanderbilt University, Nashville, TN) and verified by another member of the research team.

The FMA-UE assesses reflex action, movement and coordination of the shoulder, elbow, forearm, wrist and hand.<sup>30</sup> Each item is scored by visual observation on a three-point ordinal scale (0=cannot perform; 1=performs partially; 2=performs fully). Each item is added for a maximal score of 66 indicating complete motor recovery.

The CAHAL is a performance-based assessment of arm/hand functional recovery. It comprises seven bimanual tasks.<sup>31</sup> Each task is scored on a 7-point scale (1=total assistance; 7=total independence). Higher scores indicate greater functional independence.

The Confidence in Arm and Hand Movement is a self-reported measure of self-efficacy for paretic arm/hand function in social or home/community contexts.<sup>35</sup> It consists of 20 questions scored on a visual analogue scale (0=very uncertain, 100=very certain). The scores are averaged to provide a total scale score between 0 to 100, with higher scores showing greater self-efficacy.

The Rating of Everyday Arm-use in the Community and Home is a self-reported measure of paretic arm use outside the clinical setting.<sup>32</sup> It comprises two scales, based on whether the dominant or non-dominant arm is affected. Each scale consists of 6 categories of use (0=No Use; 5=Full Use).

The Motor Activity Log is a 14-item self-reported measure administered by semi-structured interview.<sup>34</sup> The shorter version was selected over the original Motor Activity Log to minimize administration burden of multiple surveys. The psychometric properties are similar to the original Motor Activity Log.<sup>34,36</sup> Participants are asked to determine (a) how much (amount of use scale), and (b) how well (quality of movement scale) they used the paretic arm/hand in the past week. Scoring ranges from 0 (never use the paretic arm/hand) to 5 (same as pre-stroke). For each scale, scores are averaged with higher scores indicating higher amount of use or movement quality.

The SUS was adapted to capture the usability of wearable sensors.<sup>33</sup> The adapted SUS consists of seven questions with five response options (Strongly agree to Strongly disagree) to capture complexity, ease of use, ease to learn, awkwardness and confidence in use. The scores for each question are added and transformed into a 0-100 scale (0=negative; 100=positive). To facilitate the interpretation of our data, mainstream wearable fitness devices (e.g., FitBit, Apple Watch, etc.) are rated between 61.4-67.6/100 on the SUS by neurotypical volunteers.<sup>37</sup>

#### 2.5.2. *Wearable sensor measurement:*

MiGo captures time in active movement for each arm and arm use ratio (minutes of paretic arm activity/minutes of less-affected arm activity). In neurotypical adults, the mean (standard deviation) use ratio is 0.95(0.06), which indicates nearly equal durations of arm/hand movement during daily activity.<sup>38</sup> Active movements were recorded in 15-min time bins across the monitoring period and were aggregated for each day. A custom software program was used to extract the raw data, and the maximum daily active time, for each sensor.

#### 2.6. *Data analysis:*

Descriptive statistics were used to summarize the data. Adherence was computed over the seven days of monitoring, even if some participants wore the sensors for a longer period. Wearing time was calculated from the 15-min raw data log. Wearing time was determined as the first time in the day when an increase in active time was noted within a 15-min bin to the last 15-min bin of active time at the end of the day for either sensor. Periods of inactivity during the day (e.g., during a nap) were not removed from the total wear time. To determine if wear time or paretic arm/hand use changed over time, repeated measures of variance were used. Hourly arm/hand use was also calculated and averaged across the wearing period to represent paretic and less-affected arm/hand activity. The coefficient of variation for each hour and each day was computed and averaged for the monitoring period.

Due to the small sample size, non-parametric statistics were used. Correlations between clinical measures (FMA-UE, CAHAI, Rating of Everyday Arm-use in the Community and Home, Motor Activity Log, Confidence in Arm and Hand Movement) and paretic arm/hand use were analyzed with Spearman's rank correlation and 95% confidence intervals were computed with RStudio 2022.07.2+576. A significance value of  $p < 0.05$  was set for all statistical tests. Correlation coefficients between 0.70-1.00 were considered strong, 0.40-0.69 moderate and 0-0.39 weak.<sup>39</sup> A cut-off score on the FMA-UE of 50/66 was used to classify the motor impairments severity levels, based on previous work demonstrating that stroke survivors with a score of  $>50$  on the FMA-UE have significantly higher arm/hand use than those with a score  $<50$ .<sup>40,41</sup> Recordings from the semi-structured interviews were transcribed verbatim and analyzed using thematic inductive analysis by two independent researchers.<sup>42</sup> Any disagreements were resolved by discussion.

## 2.7. Role of funders

The funders played no role in the design, conduct, or reporting of this study.

## 3. Results

### 3.1. Description of participants

A total of 32 participants were recruited but 2 did not meet the inclusion criteria (i.e., severe cognitive impairments and ambulation with assistance). Our final sample comprised 30 chronic stroke survivors. No drop out occurred during the monitoring period. The median FMA-UE score was 46.0 (range 18-66; see Table 1 for participant characteristics), with an equal split between participants  $<50$  and  $>50$  on the FMA-UE.

**Insert\_Table\_1\_around\_here**

### 3.2. Feasibility

#### a) Adherence and technical issues

87.6% of the monitoring period was valid. Out of 210 total days of data collection, 10 days were missing due to lack of adherence, 2 days for error with the server, and 14 days for sensors malfunction. One participant called the team to report sensor malfunction and eight follow-up

phone calls were made after catching adherence or system issues. Reasons for lack of adherence were cold-like symptoms unrelated to the study (n=2), forget to charge or wear the sensors (n=3) or incompatible activities (n=2). Three participants chose not to wear the sensors for one or multiple days. Both participants with cold-like symptoms chose to add one day to the data collection to compensate for a missed day. Sensors' average wear time/day was 12.6(0.2) hours. There was no significant change in the wear time ( $F=1.74$ ,  $p=0.15$ ) or the paretic arm use over days ( $F=1.41$ ,  $p=0.24$ ). The coefficients of variation were 0.20 and 0.62 for day-to-day and hour-to-hour variability within participants, respectively.

The main technical issues were errors with the server and sensor malfunction. Server errors occurred in five participants, but data were recovered for three of them, leading to two missing days in total. Sensor malfunctions were trouble synching with the gateway (n=3; 9 days) or broken sensor during the monitoring period (n=1; 5 days). Researchers walked participants through the procedures to resolve the synchronization issue, but two participants did not understand this procedure, even after demonstration and verbal guidance. Since feedback capability was disabled during the data monitoring period, some participants mentioned they did not know if the sensors were working properly or if data were being recorded.

"I didn't experience technical issues, but I wasn't sure if it was working every day. I couldn't tell because there's no kind of feedback to me that meant it was working or it was on."

#### b) Safety and comfort

Most participants did not experience issues related to safety or discomfort. In general, the wristbands were comfortable, and the elastic band was preferred to the silicone band. Three participants reported discomfort and difficulty to adjust the silicone band. One additional participant reported that the wristband interfered with his resting splint. Despite the use of an alternative wristband, challenges to don/doff the sensors were reported by those with severe motor impairments, with three receiving regular assistance from caregivers. Unrelated adverse events occurred in three participants: cold-like symptoms (n=2), fall that occurred after the monitoring period (n=1) and hospitalization due to low potassium levels (n=1).

"I found the silicone band on the one wrist. I would get things caught in it. The elastic band was better."

"Putting them on was the hard part."

#### c) Acceptance and satisfaction

The mean SUS was 85.4(13.0)/100, which indicates high usability. Most participants reported having a seamless experience with the data monitoring and forgot they had the sensors on. Many felt that wearing wrist sensors made them more aware of their behavior. Participants mentioned that knowledge of being monitored was a motivation to use their paretic arm and hand more.

"Once it's put on, I forget about it the rest of the day."

"It was wonderful. I didn't mind one day doing it."

"Having to understand that [I was being monitored] kept me motivated. I am more aware of my movement. My affected side, I noticed it more so than last week."



### 3.3. Associations between motor capacity and performance

The mean paretic arm use ratio was 0.50(0.19) and the hourly paretic arm use duration was 6.70(3.74) minutes during waking hours. Both were normally distributed. Paretic arm use ratio differed between participants with >50 FMA-UE (0.62(0.18)) and those with <50 FMA-UE (0.41(0.15),  $p=0.01$ ). Measures of motor capacity both at the body function/structure and activity levels were positively correlated with the measure of performance captured by the wearable sensors (Table 2; Fig. 1 panels A and C). This suggests that **participants with greater motor capacity use the paretic arm/hand more**. The correlation between CAHA and the wearable sensor data was the strongest ( $\rho = 0.713$ ,  $p<0.001$ , Fig. 1B). Self-efficacy (Fig. 1D) was also moderately associated with paretic arm use ratio in the natural environment, with higher paretic arm/hand use in participants with higher confidence in their paretic arm/hand movements.

**Insert\_Figure\_1\_and\_Table\_2\_around\_here**

There was a moderate positive correlation ( $\rho= 0.69$ ,  $p<0.001$ ) between the time in active movement of the paretic versus less-affected arm/hand. As less-affected arm/hand active movement increased, so did the paretic arm/hand active movement (Fig. 2A). Data visual inspection did not identify clear patterns of greater paretic arm/hand activity at certain times of the day between or within participants. Wearing schedule also varied between participants to accommodate their own schedule. On average, late mornings (10am-1pm) were periods of greater paretic arm/hand use with arm/hand activity slowly decreasing throughout the day (Fig. 2B) with large variability between participants. From the qualitative data, most participants reported that the monitoring period was representative of their typical activities. Nonetheless, the wearing schedule (12h/day) did not capture all the activities performed during a given day, as some participants made exercises in bed in the morning, walked their dogs or prepared breakfast before donning the sensors.

“I decided I wasn’t going to do anything different, because I didn’t want to alter the data. I wasn’t going to pretend that I’m different.”

“I didn't put [the sensors] on until after I got dressed. Every morning I get up, eat breakfast and then I get dressed.”

**Insert\_Figure\_2\_around\_here**

## 4. Discussion

The results confirmed the short-term feasibility and usability of a consumer-grade wrist-worn sensor to capture arm/hand activity in chronic stroke survivors with mild-severe arm motor impairments, as all our milestones were met. Sensor-derived motor performance was closely related to clinical measures of motor capacity (impairments, activity limitations and self-perceived arm/hand use and quality) and self-efficacy. Our results are consistent with previous

work done in the subacute stroke care setting demonstrating the relatedness between sensorimotor capacity and performance.<sup>43-46</sup>

In contrast to investigations of physical activity levels which require one week of data collection to capture inter-day variability,<sup>47</sup> previous work examining post-stroke upper limb activity typically uses 24-72h monitoring periods.<sup>15,38,40,43,48,49</sup> We chose a 12h wearing schedule to accommodate for MiGo's battery life (~72h) and the lack of waterproof enclosure. This wearing schedule can lead to the loss of important data, such as bathing and getting dressed. Water resistance and long battery life are important features to consider for future wearable technology. Based on the variability of the data, short data monitoring periods (24-72h) over 24h periods may be sufficient for research purposes. The fact that our participants rated a one-week monitoring period as acceptable bodes well for future clinical use where these longer monitoring periods may be necessary to better understand the multiple factors impacting arm/hand use after stroke in the natural environment.<sup>35</sup> Of note, wear time did not decrease over the monitoring period, an indication that there were no apparent novelty or fatigue effects over the week.

The usability of the system was higher than SUS ratings from consumer-grade fitness devices.<sup>37</sup> Nonetheless, discomfort with the silicone band and challenges to don/doff the sensors were raised. Consistent with our validity and usability findings,<sup>20</sup> most participants were satisfied with the elastic band on the less-affected wrist. Elastic bands on both wrists should be considered for future use. For participants with severe motor impairments, individualized solutions to don/doff the sensors independently should be investigated. Options, such as a slap bracelet or a band that has open ends that curl around the wrist instead of fastening, could be explored, as those bands were preferred by stroke survivors and therapists as reported in a previous study.<sup>50</sup> We took multiple steps to minimize missing data (e.g., tips sheet, daily monitoring of the web platform and follow-up phone calls). These efforts may have contributed to the high percentage of valid data but may be more difficult to accomplish in a clinical setting.

Some technical issues and malfunction occurred during this study, but this was expected at this stage of technology maturity. The use of a cellular gateway to transfer the data to a secured server allowed the research team to monitor adherence remotely and quickly identify and resolve technical issues. However, some sensors did not synch properly with the gateway and not all participants were able to learn the procedure to rectify the issue. Since MiGo feedback capabilities were disabled by design, participants could not identify if technical issues occurred. While it is not expected that feedback capabilities would be disabled when this technology is implemented outside the artificial research setting, this was highlighted as a limitation by our participants.

The results support our hypothesis that motor capacity and sensor-based performance measures are closely related, with the CAHAI having the strongest correlation. This is not surprising, as both measures captured bimanual arm use. Importantly, most daily activities require the use of both arms/hands. This phenomenon has been known for some time.<sup>51</sup> The contribution of both arms/hands to daily activity is also supported by the close relationship

between activity of the paretic and less-affected arms, which replicated the results from Bailey et al.<sup>52</sup> However, while motor capacity and performance are related, our findings do not suggest that an improvement in motor capacity or self-efficacy will lead to an improved motor performance. Both Lang *et al.*<sup>6</sup> and Doman *et al.*<sup>53</sup> have demonstrated that improvements on standardized measures made after intensive rehabilitation do not translate to improvement in arm/hand use in the natural environment for most stroke survivors. Consistent with previous work,<sup>40,41</sup> we found a significant difference between participants with a FMA-UE score <50 and those >50. This is aligned with the virtuous cycle of recovery hypothesis stating that for people with mild-moderate sensorimotor impairments, high levels of use and function reinforce each other.<sup>12</sup> Recent work identified that stroke survivors can be categorized into five groups based on their arm/hand use performance measured with wearable technology. These groupings could be useful for clinical practice to guide clinical decision making and personalize care.<sup>54</sup> The relationship between self-perceived arm/hand use and sensor-derived measures was higher than hypothesized. One possible interpretation based on our qualitative data is that the act of wearing the sensors, even with the feedback turned off, made participants more aware of their behavior, thus engaging participants in a more mindful evaluation of paretic arm/hand use in daily activities. Our results corroborate recent literature correlating self-efficacy and paretic arm use, and support self-efficacy as a factor that may explain the disparity between motor capacity and performance.<sup>41,55-57</sup> Self-efficacy, or an individuals' belief in their capacity to achieve certain outcomes, influences rehabilitation outcomes and, consistent with our findings, performance.<sup>58</sup> We observed greater paretic arm/hand activity in the morning with activity slowly decreasing throughout the rest of the day. This might reflect a diminution in energy during the day, as poststroke fatigue is common.<sup>59</sup> This work adds to the body of knowledge by providing promising implications for clinical practice: 1) encouraging stroke survivors to increase activity of the less-affected arm/hand may facilitate an increase in paretic arm/hand activity thereby leveraging the well-known prevalence of bimanual activities in the unsupervised setting, 2) interventions to enhance self-efficacy in therapy should be explored as a means to increase arm/hand use, and 3) mornings/early afternoons may be optimal time window targets for interventions.

#### 4.1. Limitations

We recruited participants who chose to participate in our previous validity study and from an IRB approved database. As such, these volunteers may represent a group of early adopters of new technologies who are more compliant with study procedures than a typical chronic post-stroke population. The limitations of the wearable sensor data should be acknowledged in the interpretation of the relationship between capacity and performance, as wrist-worn wearable sensors cannot capture finger movements nor distinguish between purposeful and non-purposeful movements.<sup>60</sup> It is possible that the administration of the Motor Activity Log after the monitoring period could inadvertently draw attention to their activity. **Finally, all analyses were correlational, which prevents any causation conclusions to be drawn.**

#### 4.2. Conclusion

The feasibility of the commercial-grade wearable sensor system offers new possibilities for clinical practice to complement existing clinical assessments. Knowledge of spontaneous

bimanual arm/hand use in the daily environment may provide a foundation for neurorehabilitation clinicians to 1) assess the transfer of skills gained in therapy to real-life situations, 2) guide personalized interventions and 3) evaluate progress.<sup>50,61</sup> Participants' perception of the usefulness of wearable sensors to encourage movement behavior supports the potential of wearable technology, not just as an assessment tool, but as a means to deliver real-time interventions outside the clinical setting. Future work should aim to develop theoretically driven and evidence-based interventions that leverage wearable technology to promote recovery-enabling behaviors.<sup>12</sup>

## 5. Acknowledgements

We acknowledge the contributions of Tanisha Gunby for assistance with data collection and data entry and of Courtney Koleda and Justine Buenaventura for their assistance with verbatim transcription and data verification.

## 6. References

1. Chen SY, Winstein CJ. A systematic review of voluntary arm recovery in hemiparetic stroke: Critical predictors for meaningful outcomes using the international classification of functioning, disability, and health. *Journal of Neurologic Physical Therapy*. 2009;33(1):2-13. doi:10.1097/NPT.0b013e318198a010
2. Lieshout ECC van, van de Port IG, Dijkhuizen RM, Visser-Meily JMA. Does upper limb strength play a prominent role in health-related quality of life in stroke patients discharged from inpatient rehabilitation? *Topics in Stroke Rehabilitation*. 2020;27(7):525-533. doi:10.1080/10749357.2020.1738662
3. Mayo NE, Wood-Dauphinee S, Ahmed S, et al. Disablement following stroke. *Disability and Rehabilitation*. 1999;21(5-6):258-268. doi:10.1080/096382899297684
4. World Health Organization. Towards a common language for function, disability and health: ICF beginner's guide. *Geneva: WHO*. Published online 2002.
5. Stewart JC, Cramer SC. Patient-reported measures provide unique insights into motor function after stroke. *Stroke*. 2013;44(4):1111-1116. doi:10.1161/STROKEAHA.111.674671
6. Lang CE, Holleran CL, Strube MJ, et al. Improvement in the capacity for activity versus improvement in performance of activity in daily life during outpatient rehabilitation. *Journal of Neurologic Physical Therapy*. 2023 Jan;47(1):16. doi:10.1097/NPT.0000000000000413
7. Simpson LA, Mow A, Menon C, Eng JJ. Preliminary examination of the ability of a new wearable device to capture functional hand activity after stroke. *Stroke*. 2019;50(12):3643-3646. doi:10.1161/STROKEAHA.119.026921

8. Urbin MA, Waddell KJ, Lang CE. Acceleration metrics are responsive to change in upper extremity function of stroke survivors. *Archives of Physical Medicine and Rehabilitation*. 2015;96(5):854-861. doi:10.1016/j.apmr.2014.11.018
9. Winstein C, Varghese R. Been there, done that, so what's next for arm and hand rehabilitation in stroke? *NeuroRehabilitation*. 2018;43(1):3-18. doi:10.3233/NRE-172412
10. Chen J, Nichols D, Brokaw EB, Lum PS. Home-based therapy after stroke using the hand spring operated movement enhancer (HandSOME). *IEEE Transactions on Neural Systems and Rehabilitation Engineering*. 2017;25(12):2305-2312. doi:10.1109/TNSRE.2017.2695379
11. Torriani-Pasin C, Demers M, Polese JC, et al. mHealth technologies used to capture walking and arm use behavior in adult stroke survivors: a scoping review beyond measurement properties. *Disability and Rehabilitation*. 2022; 44(20):6094-6106. doi:10.1080/09638288.2021.1953623
12. Ballester BR, Winstein C, Schweighofer N. Virtuous and Vicious Cycles of Arm Use and Function Post-stroke. *Frontiers in Neurology*. 2022;13:804211. doi:10.3389/fneur.2022.804211
13. Uswatte G, Giuliani C, Winstein C, Zeringue A, Hobbs L, Wolf SL. Validity of accelerometry for monitoring real-world arm activity in patients with subacute stroke: evidence from the Extremity Constraint-Induced Therapy Evaluation Trial. *Archives of Physical Medicine and Rehabilitation*. 2006;87(10):1340-1345. doi:10.1016/j.apmr.2006.06.006
14. Lang CE, Waddell KJ, Klaesner JW, Bland MD. A Method for Quantifying Upper Limb Performance in Daily Life Using Accelerometers. *Journal of Visual Experiment*. 2017;(122):55673. doi:10.3791/55673
15. Bailey RR, Klaesner JW, Lang CE. Quantifying Real-World Upper-Limb Activity in Nondisabled Adults and Adults With Chronic Stroke. *Neurorehabilitation and Neural Repair*. 2015;29(10):969-978. doi:10.1177/1545968315583720
16. Demers M, Rowe J, Bishop L, Zondervan D, Winstein C Insights gained from activity monitors for upper limb stroke rehabilitation. *Archives of Physical Medicine and Rehabilitation*. 2021; 102(10): E21. doi: 10.1016/j.apmr.2021.07.517
17. Lang CE, Barth J, Holleran CL, Konrad JD, Bland MD. Implementation of wearable sensing technology for movement: pushing forward into the routine physical rehabilitation care field. *Sensors*. 2020;20(20):5744. doi:10.3390/s20205744
18. Moon NW, Baker PM, Goughnour K. Designing wearable technologies for users with disabilities: Accessibility, usability, and connectivity factors. *Journal of Rehabilitation and Assistive Technologies Engineering*. 2019;6:205566831986213. doi:10.1177/2055668319862137

19. Rowe VT, Neville M. Measuring Reliability of Movement With Accelerometry: Fitbit® Versus ActiGraph®. *The American Journal of Occupational Therapy*. 2019;73(2):7302205150p1-7302205150p6. doi:10.5014/ajot.2019.030692
20. Rowe J, Demers M, Bishop L, Zondervan D, Winstein C. Validity and usability of a wearable, multi-sensor system for monitoring upper and lower limb activity in chronic stroke survivors in a community setting. American Society of NeuroRehabilitation annual conference (virtual), April 5-9, 2021.
21. Ballester BR, Maier M, San Segundo Mozo RM, Castañeda V, Duff A, M. J. Verschure PF. Counteracting learned non-use in chronic stroke patients with reinforcement-induced movement therapy. *Journal of NeuroEngineering and Rehabilitation*. 2016;13(1):1-15. doi:10.1186/s12984-016-0178-x
22. Lewis J. The System Usability Scale: Past, Present, and Future. *International Journal of Human-Computer Interaction*. 2018;34(7):577-590.
23. Adams SA, Matthews CE, Ebbeling CB, et al. The effect of social desirability and social approval on self-reports of physical activity. *American Journal of Epidemiology*. 2005; 161(4):389-398. doi:10.1093/aje/kwi054
24. Prince SA, Adamo KB, Hamel M, Hardt J, Connor Gorber S, Tremblay M. A comparison of direct versus self-report measures for assessing physical activity in adults: a systematic review. *International Journal of Behavioral Nutrition and Physical Activity*. 2008;5(1):56. doi:10.1186/1479-5868-5-56
25. Waddell KJ, Lang CE. Comparison of self-report versus sensor-based methods for measuring the amount of upper limb activity outside the clinic. *Archives of Physical Medicine and Rehabilitation*. 2018; 99(9):1913-1916. doi:10.1016/j.apmr.2017.12.025
26. Bailey MJ, Riddoch MJ, Crome P. Test-retest stability of three tests for unilateral visual neglect in patients with stroke: Star Cancellation, Line Bisection, and the Baking Tray Task. *Neuropsychological Rehabilitation*. 2004;14(4):403-419. doi:10.1080/09602010343000282
27. Nasreddine ZS, Phillips NA, Bédirian V, et al. The Montreal Cognitive Assessment, MoCA: a brief screening tool for mild cognitive impairment. *Journal of the American Geriatrics Society*. 2005;53(4):695-699. doi:10.1111/j.1532-5415.2005.53221.x
28. Brott T, Adams HP, Olinger CP, et al. Measurements of acute cerebral infarction: a clinical examination scale. *Stroke*. 1989;20(7):864-870. doi:10.1161/01.STR.20.7.864
29. Oldfield RC. The assessment and analysis of handedness: The Edinburgh inventory. *Neuropsychologia*. 1971;9(1):97-113. doi:10.1016/0028-3932(71)90067-4

30. Fugl-Meyer AR, Jääskö L, Leyman I, et al. The post stroke hemiplegic patient. I. A method for evaluation of physical performance. *Scandinavian Journal of Rehabilitation Medicine*. 1975;7(1):13-31.
31. Barreca S, Gowland C, Stratford P, et al. Development of the Chedoke Arm and Hand Activity Inventory: theoretical constructs, item generation, and selection. *Topics in Stroke Rehabilitation*. 2004;11(4):31-42.
32. Simpson LA, Eng JJ, Backman CL, Miller WC. Rating of Everyday Arm-Use in the Community and Home (REACH) Scale for capturing affected arm-use after stroke: development, reliability, and validity. *PLoS ONE*. 2013;8(12):e83405. doi:10.1371/journal.pone.0083405
33. Brooke J. A “quick and dirty” usability scale. In: *Usability Evaluation in Industry*. Taylor & Francis; 1996:189-194.
34. Uswatte G, Taub E, Morris D, Vignollo M, McCulloch K. Reliability and validity of the upper-extremity Motor Activity Log-14 for measuring real-world arm use. *Stroke*. 2005;36(11):2493-2496. doi:10.1161/01.STR.0000185928.90848.2e
35. Lewthwaite R, Blanton S, Zeringue A, Winstein C, Wolf S. Validity and reliability of the Confidence in Arm and Hand Movement (CAHM) scale. *in preparation*.
36. van der Lee J H, Beckerman H, Knol DL, de Vet HCW., Bouter LM. Clinimetric properties of the Motor Activity Log for the assessment of arm use in hemiparetic patients. *Stroke*. 2004;35(6):1410-1414. doi:10.1161/01.STR.0000126900.24964.7e
37. Liang J, Xian D, Liu X, et al. Usability study of mainstream wearable fitness devices: feature analysis and System Usability Scale evaluation. *JMIR mHealth and uHealth*. 2018;6(11). doi:10.2196/11066
38. Bailey RR, Lang CE. Upper extremity activity in adults: Referent values using accelerometry. *Journal of Rehabilitation Research & Development*. 2014;50(9):1213-1222. doi:10.1037/a0032811.Child
39. Schober P, Boer C, Schwarte LA. Correlation coefficients: Appropriate use and interpretation. *Anesthesia & Analgesia*. 2018;126(5):1763-1768. doi:10.1213/ANE.0000000000002864
40. Chin LF, Hayward KS, Brauer S. Upper limb use differs among people with varied upper limb impairment levels early post-stroke: a single-site, cross-sectional, observational study. *Topics in Stroke Rehabilitation*. 2020;27(3):224-235. doi:10.1080/10749357.2019.1690796
41. Chen YA, Lewthwaite R, Schweighofer N, Monterosso JR, Fisher BE, Winstein C. Essential Role of social context and self-efficacy in daily paretic arm/hand use after stroke: An

- Ecological Momentary Assessment Study with accelerometry. *Archives of Physical Medicine and Rehabilitation*. 2023; 104(3), 390-402. doi:10.1016/j.apmr.2022.09.003
42. Braun V, Clarke V. Using thematic analysis in psychology. *Qualitative Research in Psychology*. 2006;3(2):77-101. doi:10.1191/1478088706qp063oa
  43. Lang CE, Wagner JM, Edwards DF, Dromerick AW. Upper extremity use in people with hemiparesis in the first few weeks after stroke. *Journal of Neurologic Physical Therapy*. 2007;31(2):56-63. doi:10.1097/NPT.0b013e31806748bd
  44. Chin LF, Hayward KS, Brauer SG. Factors influencing paretic upper limb use during first 4 weeks after stroke: a cross-sectional accelerometry study. *American Journal of Physical Medicine & Rehabilitation*. 2021;100(2):153-160.
  45. Narai E, Hagino H, Komatsu T, Togo F. Accelerometer-based monitoring of upper limb movement in older adults with acute and subacute stroke. *Journal of Geriatric Physical Therapy*. 2016;39(4):171-177. doi:10.1519/JPT.000000000000067
  46. Thrane G, Emaus N, Askim T, Anke A. Arm use in patients with subacute stroke monitored by accelerometry: association with motor impairment and influence on self-dependence. *Journal of Rehabilitation Medicine*. 2011;43:299-304. doi:10.2340/16501977-0676
  47. Tinlin L, Fini N, Bernhardt J, Lewis LK, Olds T, English C. Best practice guidelines for the measurement of physical activity levels in stroke survivors: A secondary analysis of an observational study. *International Journal of Rehabilitation Research*. 2018; 41(1), 14-19. doi:10.1097/MRR.0000000000000253
  48. Uswatte G, Foo WL, Olmstead H, Lopez K, Holand A, Simms LB. Ambulatory monitoring of arm movement using accelerometry: an objective measure of upper-extremity rehabilitation in persons with chronic stroke. *Archives of Physical Medicine and Rehabilitation*. 2005;86(7):1498-1501. doi:10.1016/j.apmr.2005.01.010
  49. Essers B, Coremans M, Veerbeek J, Luft A, Verheyden G. Daily life upper limb activity for patients with match and mismatch between observed function and perceived activity in the chronic phase post stroke. *Sensors*. 2021;21(17):5917. doi:10.3390/s21175917
  50. Lee SI, Adans-Dester CP, Grimaldi M, et al. Enabling stroke rehabilitation in home and community settings: a wearable sensor-based approach for upper-limb motor training. *IEEE Journal of Translational Engineering in Health and Medicine*. 2018;6:1-11. doi:10.1109/JTEHM.2018.2829208
  51. Kilbreath SL, Heard RC. Frequency of hand use in healthy older persons. *Australian Journal of Physiotherapy*. 2005;51(2):119-122. doi:10.1016/S0004-9514(05)70040-4



52. Bailey RR, Birkenmeier RL, Lang CE. Real-world affected upper limb activity in chronic stroke: an examination of potential modifying factors. *Topics in Stroke Rehabilitation*. 2015;22(1):26-33. doi:10.1179/1074935714Z.0000000040
53. Doman CA, Waddell KJ, Bailey RR, Moore JL, Lang CE. Changes in upper-extremity functional capacity and daily performance during outpatient occupational therapy for people with stroke. *American Journal of Occupational Therapy*. 2016;70(3):7003290040p1-7003290040p11. doi:10.5014/ajot.2016.020891
54. Barth J, Lohse KR, Konrad JD, Bland MD, Lang CE. Sensor-based categorization of upper limb performance in daily life of persons with and without neurological upper limb deficits. *Frontiers in Rehabilitation Sciences*. 2021;2:741393. <https://www.frontiersin.org/articles/10.3389/fresc.2021.741393>
55. Buxbaum LJ, Varghese R, Stoll H, Winstein CJ. Predictors of arm nonuse in chronic stroke: a preliminary investigation. *Neurorehabilitation and Neural Repair*. 2020; 34(6), 512-522.
56. Goldman-Gerber V, Schwartz I, Rand D. Upper extremity self-efficacy correlates with daily hand-use of individuals with high functional capacity post-stroke. *Disability and Rehabilitation*. 2023; 45(14), 2301-2306. doi:10.1080/09638288.2022.2087764
57. Gage M, Polatajko H. Enhancing occupational performance through an understanding of perceived self-efficacy. *The American Journal of Occupational Therapy*. 1994;48(5):452-461. doi:10.5014/ajot.48.5.452
58. Gangwani R, Cain A, Collins A, Cassidy JM. Leveraging factors of self-Efficacy and motivation to optimize stroke recovery. *Frontiers in Neurology*. 2022;13, 113. doi:10.3389/fneur.2022.823202
59. Lerdal A, Bakken LN, Kouwenhoven SE, et al. Poststroke fatigue-a review. *Journal of Pain and Symptom Management*. 2009;38(6):928-949. doi:10.1016/j.jpainsymman.2009.04.028
60. Hayward KS, Eng JJ, Boyd LA, Lakhani B, Bernhardt J, Lang CE. Exploring the role of accelerometers in the measurement of real world upper-limb use after stroke. *Brain Impairment*. 2016;17(1):16-33. doi:10.1017/BrImp.2015.21
61. Demers M, Winstein CJ. A perspective on the use of ecological momentary assessment and intervention to promote stroke recovery and rehabilitation. *Topics in Stroke Rehabilitation*. 2021;28(8):594-605. doi:10.1080/10749357.2020.1856557

## 7. Tables

**Table 1.** Demographic and clinical characteristics of 30 participants with complete data

| Characteristics                     | % or Median (IQR)           |
|-------------------------------------|-----------------------------|
| Gender                              |                             |
| Men                                 | 60.0%                       |
| Transman                            | 3.3%                        |
| Women                               | 36.7%                       |
| Age                                 | 61.5 (48.5-64.9)            |
| Race                                |                             |
| Asian                               | 17.2%                       |
| Black                               | 17.2%                       |
| Native Hawaiian or Pacific Islander | 10.3%                       |
| White or Caucasian                  | 37.9%                       |
| More than one Race                  | 17.2%                       |
| Ethnicity                           |                             |
| Hispanic                            | 30.0%                       |
| Non-Hispanic                        | 66.7%                       |
| Unknown/not reported                | 3.3%                        |
| Time since stroke (years)           | 7.3 (4.5-10.75)             |
| Hemisphere affected by the stroke   | Right, 41.4%<br>Left, 58.6% |
| NIHSS (/42)                         | 2.0 (1.0-3.0)               |
| MoCA (/30)                          | 26.0 (22.5-27.0)            |
| Edinburgh Handedness Inventory      | Right: 93.3%                |
| FMA-UE (/66)                        | 46.0 (25.0-59.0)            |
| REACH (/6)                          | 2.0 (1.0-4.0)               |
| MAL-14                              |                             |
| Amount of use (/5)                  | 2.5 (1.6-3.5)               |
| Quality of Movement (/5)            | 2.5 (1.4-2.4)               |
| CAHAI-7 (/49)                       | 27.0 (10.8-43.8)            |
| CAHM (/100)                         | 37.0 (21.0-72.0)            |

**Abbreviations:** CAHAI-7: Chedoke Arm and Hand Activity Inventory - 7, CAHM: Confidence in Arm and Hand Movement, FMA-UE: Fugl-Meyer Assessment – Upper extremity, IQR: interquartile range, MAL-14:

Motor Activity Log 14, MoCA: Montreal Cognitive Assessment, NIHSS: National Institutes of Health Stroke Scale, REACH: Rating of Everyday Arm-use in the Community and Home.

**Table 2.** Spearman correlations ( $\rho$ ) and 95% CI between paretic arm use ratio and arm motor impairments, functional capacity, perceived arm use, and self-efficacy

| Clinical measure        | $\rho$ | p-value | 95% CI      |
|-------------------------|--------|---------|-------------|
| FMA-UE                  | 0.671  | <0.001  | 0.403-0.833 |
| CAHAI                   | 0.713  | <0.001  | 0.469-0.856 |
| REACH                   | 0.597  | <0.001  | 0.295-0.790 |
| MAL-Amount of use       | 0.655  | <0.001  | 0.380-0.824 |
| MAL-Quality of Movement | 0.683  | <0.001  | 0.422-0.839 |
| CAHM                    | 0.555  | 0.01    | 0.236-0.765 |

Abbreviations: CAHAI: Chedoke Arm and Hand Activity Inventory 7, CAHM: Confidence in Arm and Hand Movement, FMA-UE: Fugl-Meyer Assessment Upper Extremity, MAL: Motor Activity Log, REACH: Rating of Everyday Arm-use in the Community and Home

## 8. Figure legends

**Fig. 1.** Relationship between wearable sensor data metrics and clinical assessment tools representative of specific domains of the International Classification of Functioning

**Fig. 1 caption:** A) Scatterplot of motor impairment (x-axis: Fugl-Meyer Assessment Upper-extremity score) vs. movement performance (y-axis: ratio of paretic arm use) in 30 chronic stroke survivors (Spearman correlation coefficient ( $\rho$ ) = 0.67,  $p < 0.001$ ). B) Scatterplot of activity limitations in bimanual tasks (x-axis: Chedoke Arm and Hand Activity Inventory-7 score) vs. movement performance (y-axis: ratio of paretic arm use), ( $\rho$  = 0.71,  $p < 0.001$ ). C) Scatterplot of Motor Activity Log – Amount of use scale (x-axis) and ratio of paretic arm use (y-axis), ( $\rho$  = 0.66,  $p < 0.001$ ) between self-perceived paretic arm use and actual paretic arm use. D) Scatterplot of self-efficacy post-monitoring period (x-axis) and ratio of paretic arm use (y-axis), ( $\rho$  = 0.55,  $p$  = 0.01).

**Fig. 2.** Scatterplot of sensor-derived paretic arm activity by Less-affected arm activity and paretic arm activity by hour across the seven days.

**Fig. 2 caption:** A) Scatterplot of movement activity of the paretic (x-axis) and less-affected (y-axis) arms, showing a moderate positive relationship ( $\rho$  = 0.69,  $p < 0.001$ ). B) Average paretic arm/hand use (in seconds) for each hour of the day for 30 participants. Wearing schedule varies between participants, but all participants wore the sensors between 11am and 9pm. 4 participants donned the sensors at 7am, 15 at 8am, 22 at 9am, 28 at 10am. 1 participant doffed the sensors at 8pm, 4 at 10pm and 9 at 11pm.

## 9. Figures

**Fig. 1.** Relationship between wearable sensor data metrics and clinical assessment tools representative of specific domains of the International Classification of Functioning

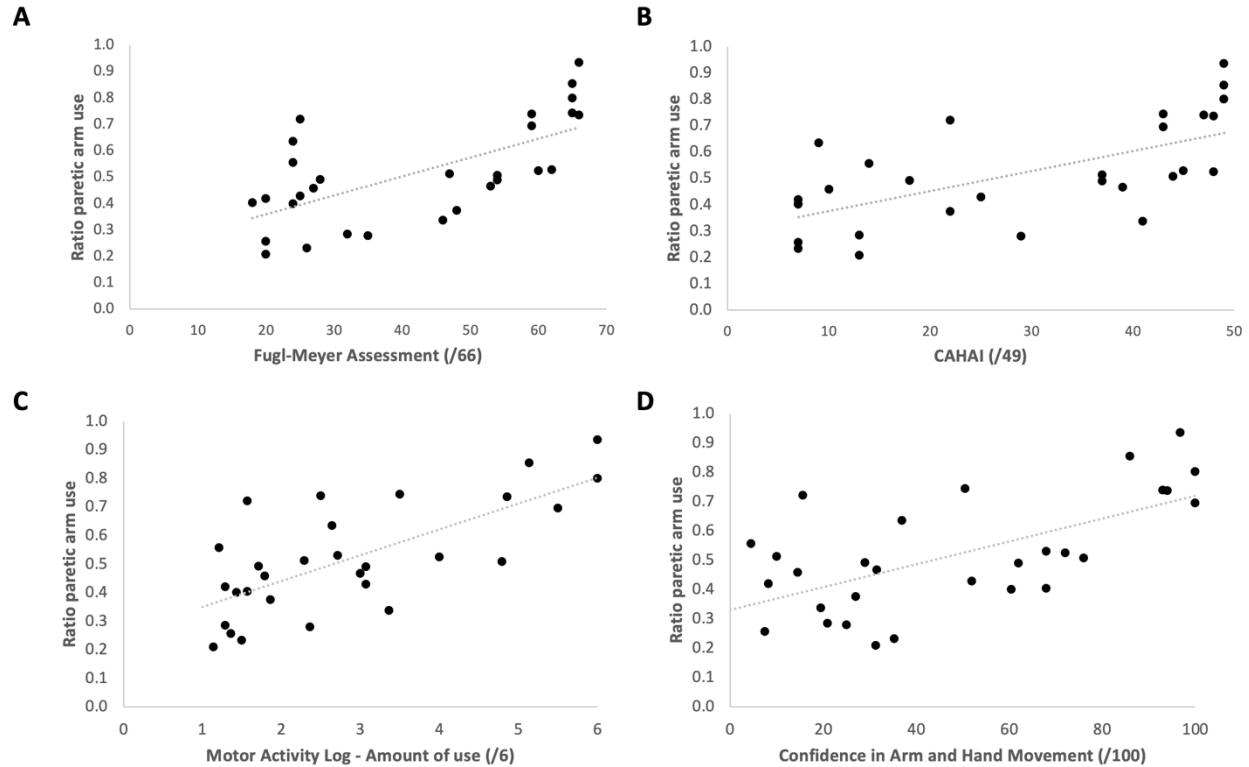

**Fig. 1 caption:** A) Scatterplot of motor impairment (x-axis: Fugl-Meyer Assessment Upper-extremity score) vs. movement performance (y-axis: ratio of paretic arm use) in 30 chronic stroke survivors (Spearman correlation coefficient ( $\rho$ ) = 0.67,  $p < 0.001$ ). B) Scatterplot of activity limitations in bimanual tasks (x-axis: Chedoke Arm and Hand Activity Inventory-7 score) vs. movement performance (y-axis: ratio of paretic arm use), ( $\rho = 0.71$ ,  $p < 0.001$ ). C) Scatterplot of Motor Activity Log – Amount of use scale (x-axis) and ratio of paretic arm use (y-axis), ( $\rho = 0.66$ ,  $p < 0.001$ ) between self-perceived paretic arm use and actual paretic arm use. D) Scatterplot of self-efficacy post-monitoring period (x-axis) and ratio of paretic arm use (y-axis), ( $\rho = 0.55$ ,  $p = 0.01$ ).

**Fig. 2.** Scatterplot of sensor-derived paretic arm activity by Less-affected arm activity and paretic arm activity by hour across the seven days.

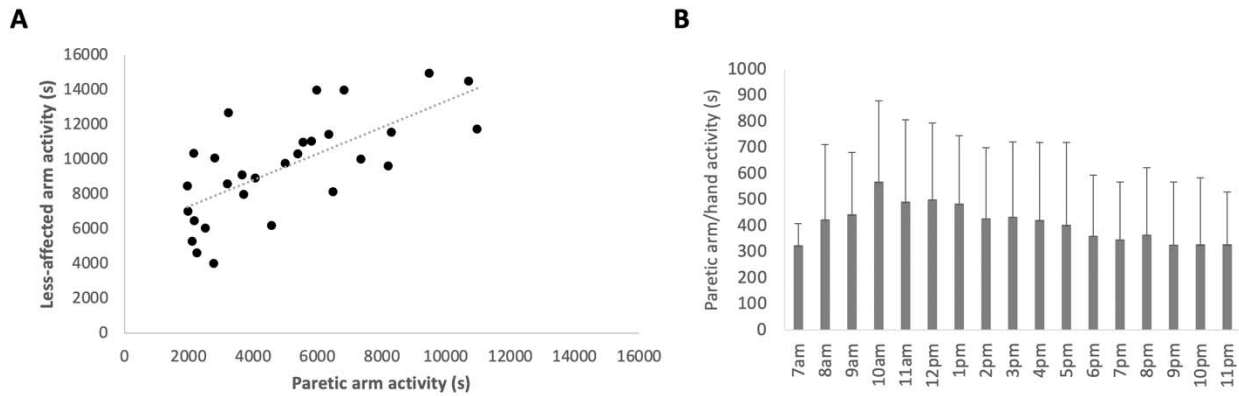

**Fig. 2 caption:** A) Scatterplot of movement activity of the paretic (x-axis) and less-affected (y-axis) arms, showing a moderate positive relationship ( $\rho = 0.69$ ,  $p < 0.001$ ). B) Average paretic arm/hand use (in seconds) for each hour of the day for 30 participants. Wearing schedule varies between participants, but all participants wore the sensors between 11am and 9pm. 4 participants donned the sensors at 7am, 15 at 8am, 22 at 9am, 28 at 10am. 1 participant doffed the sensors at 8pm, 4 at 10pm and 9 at 11pm.

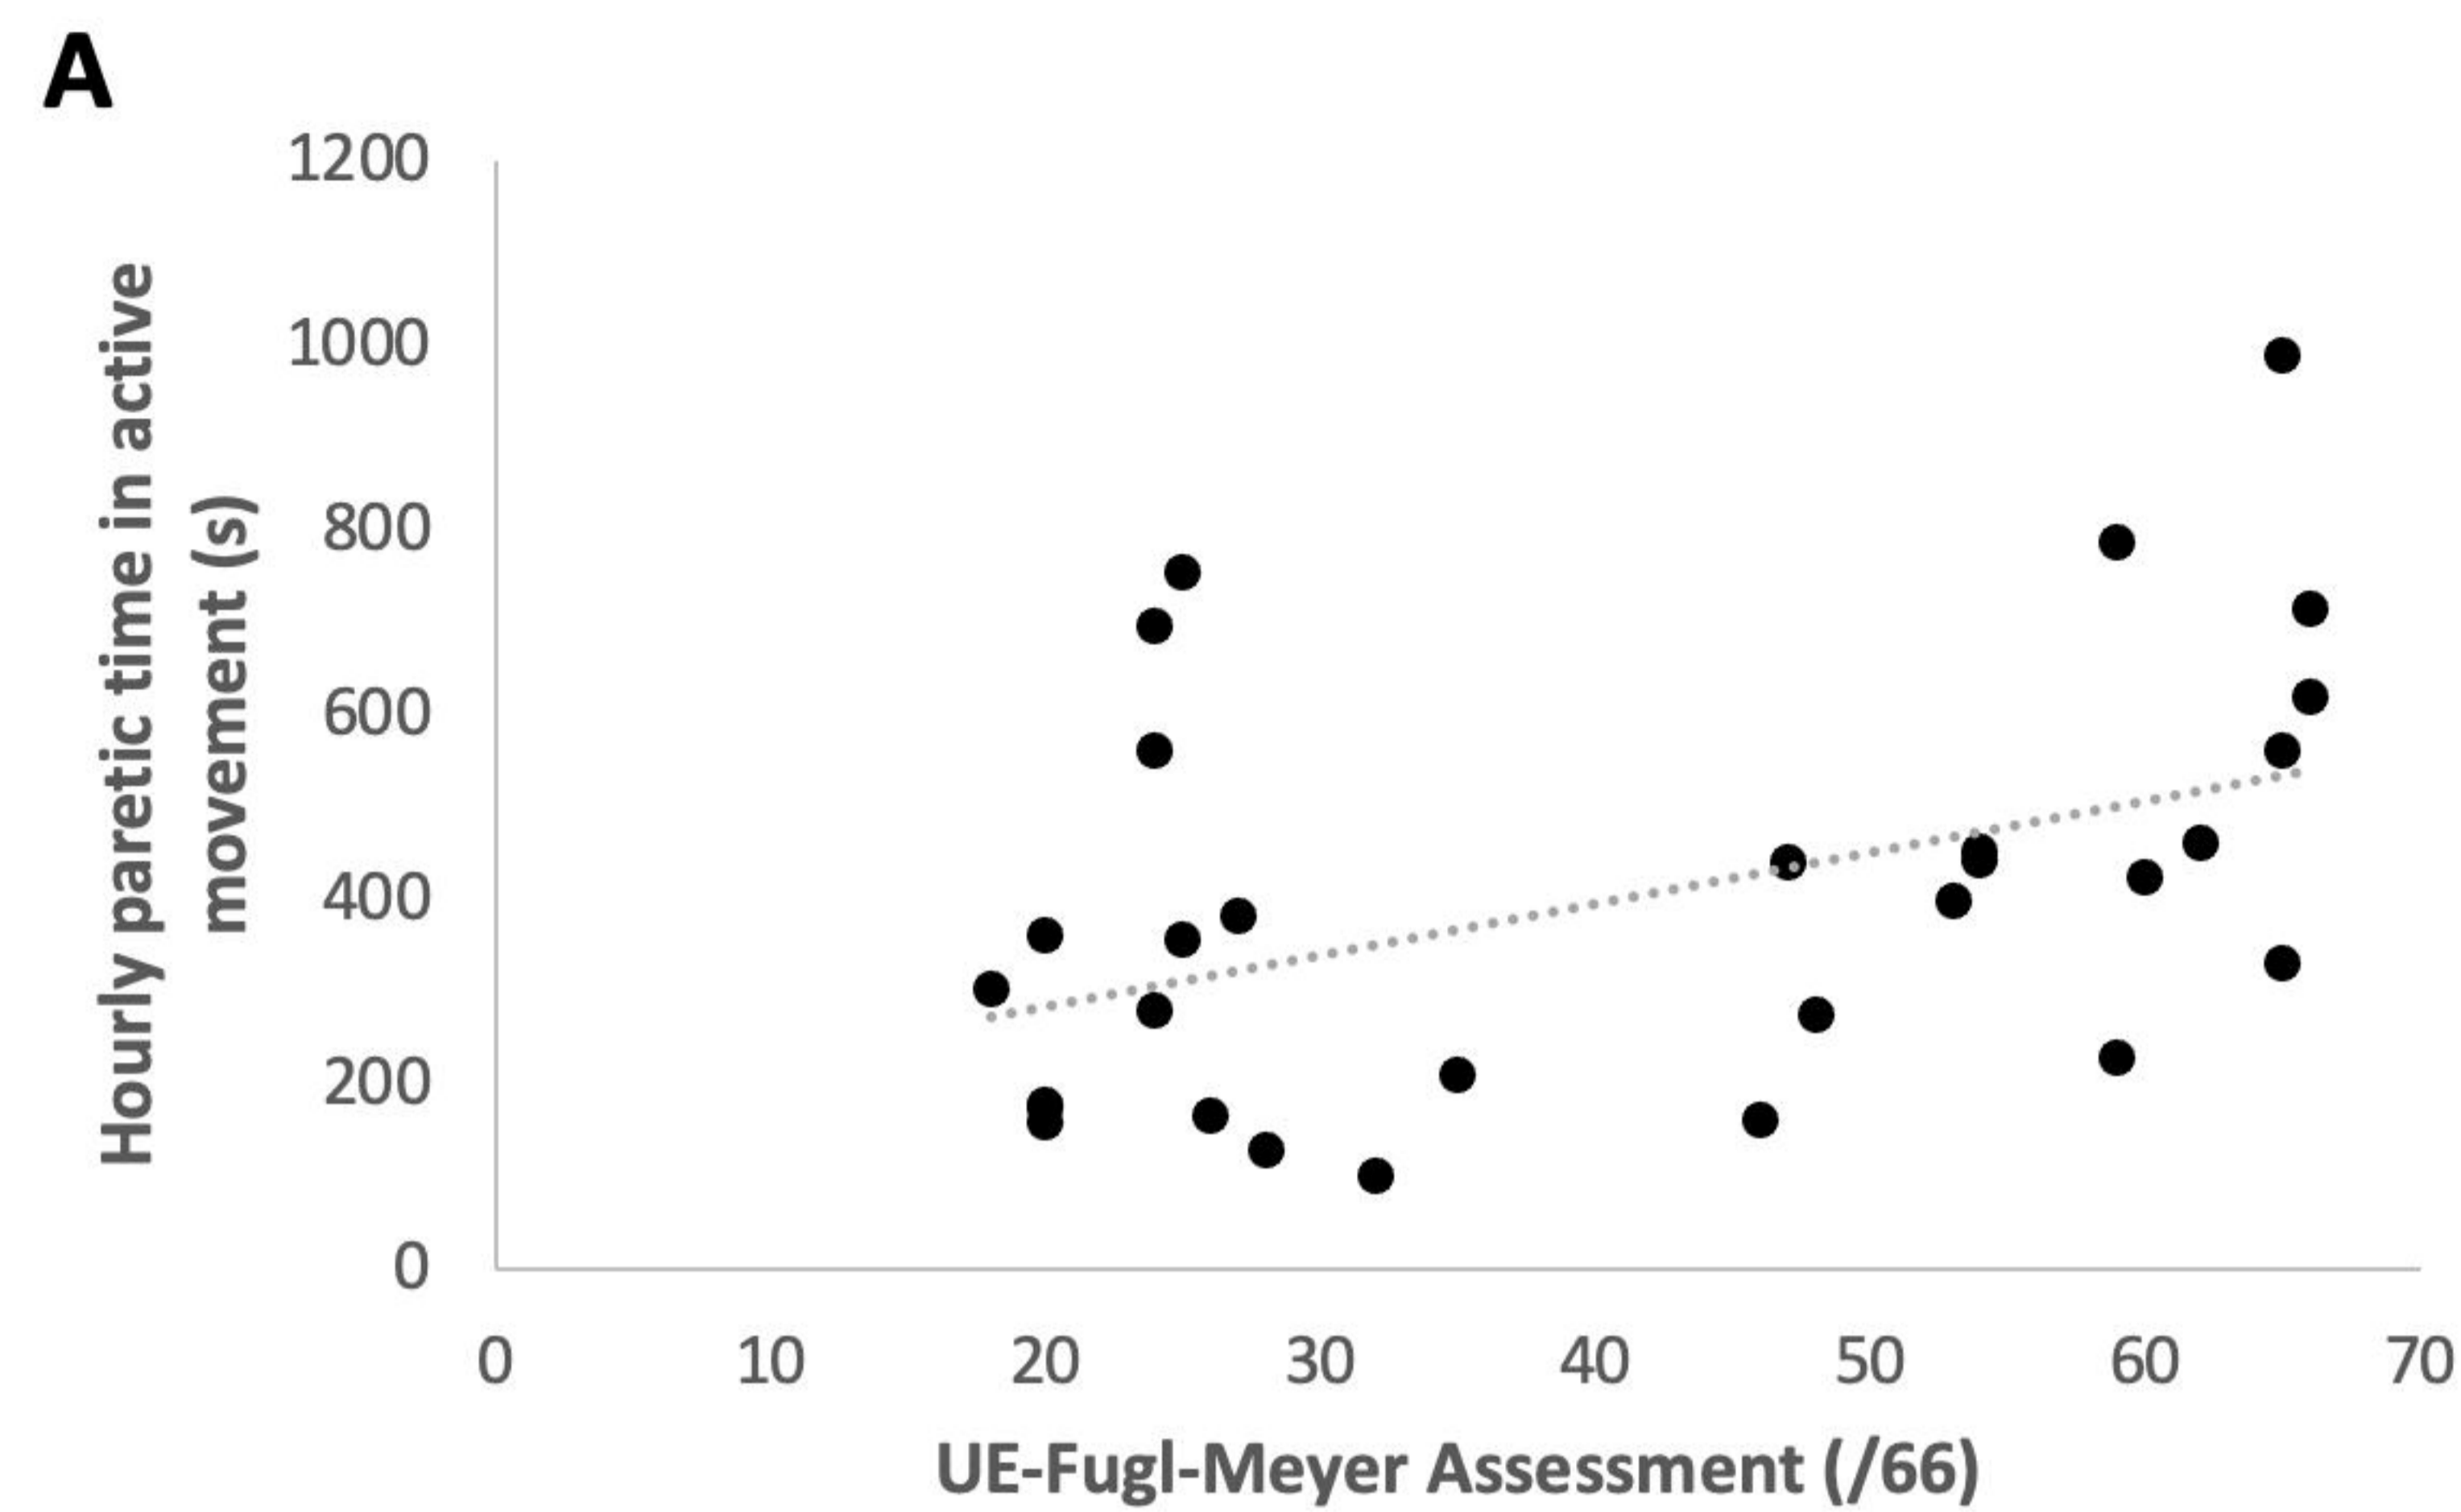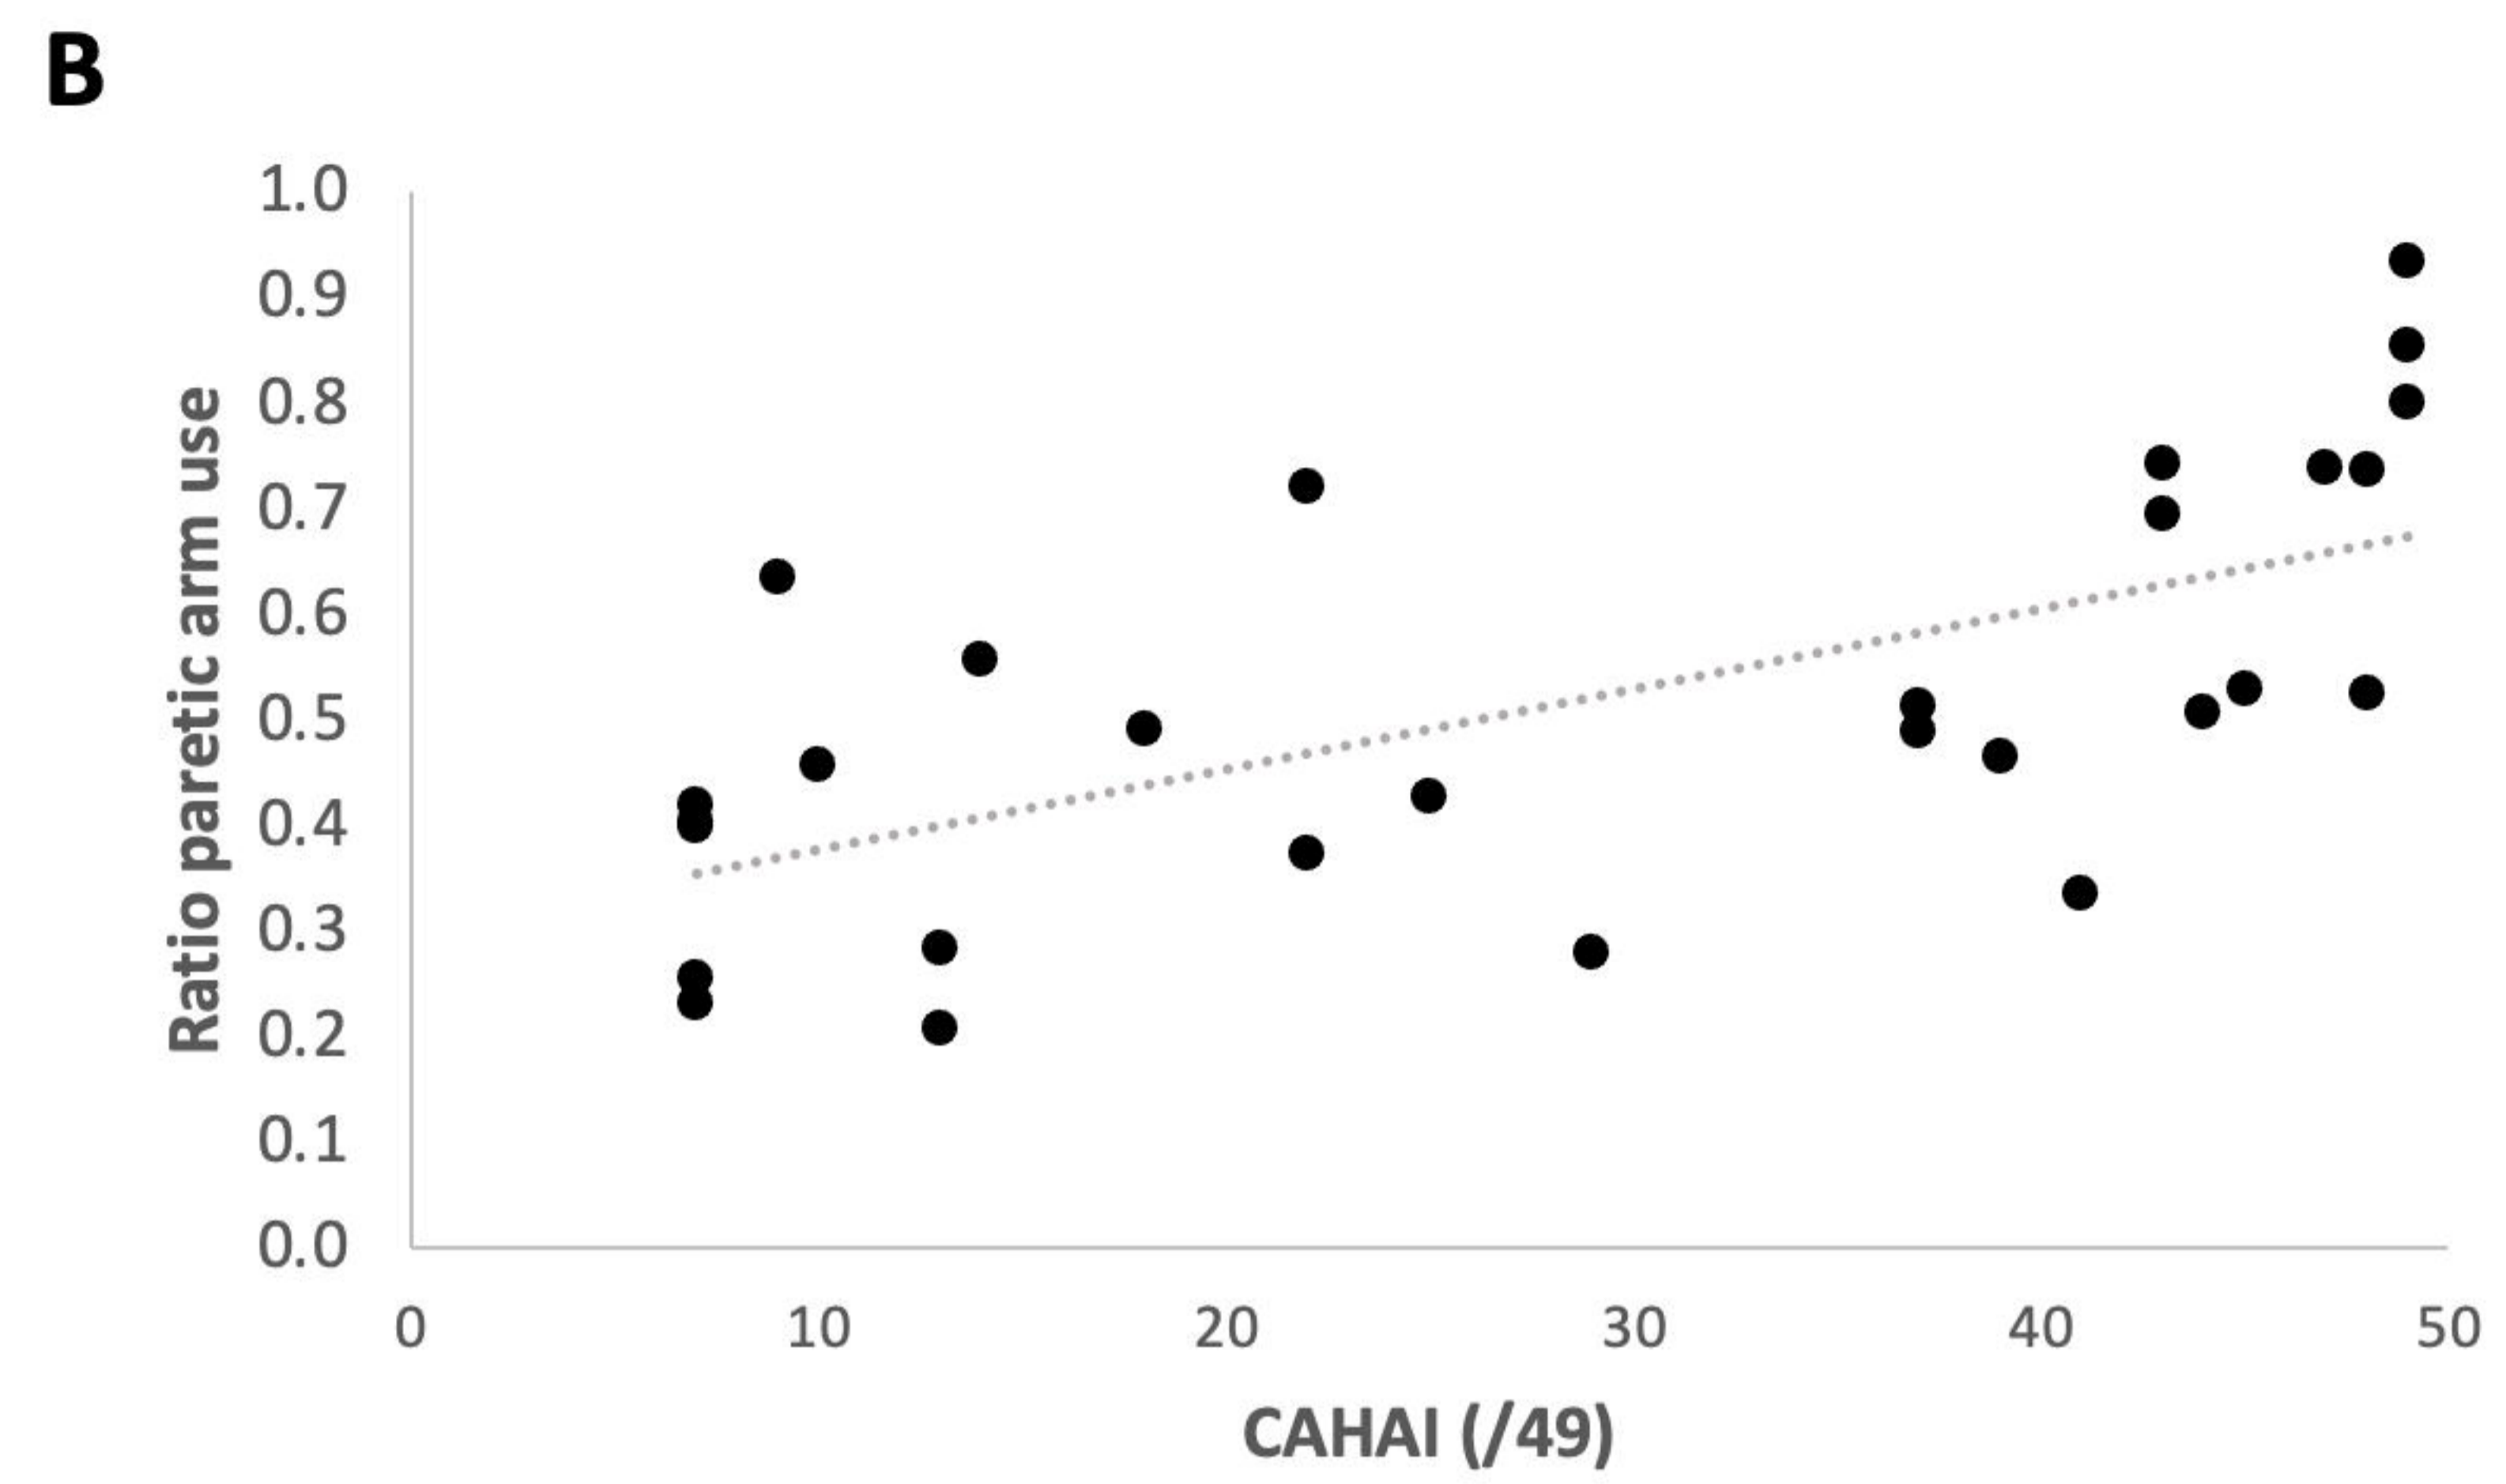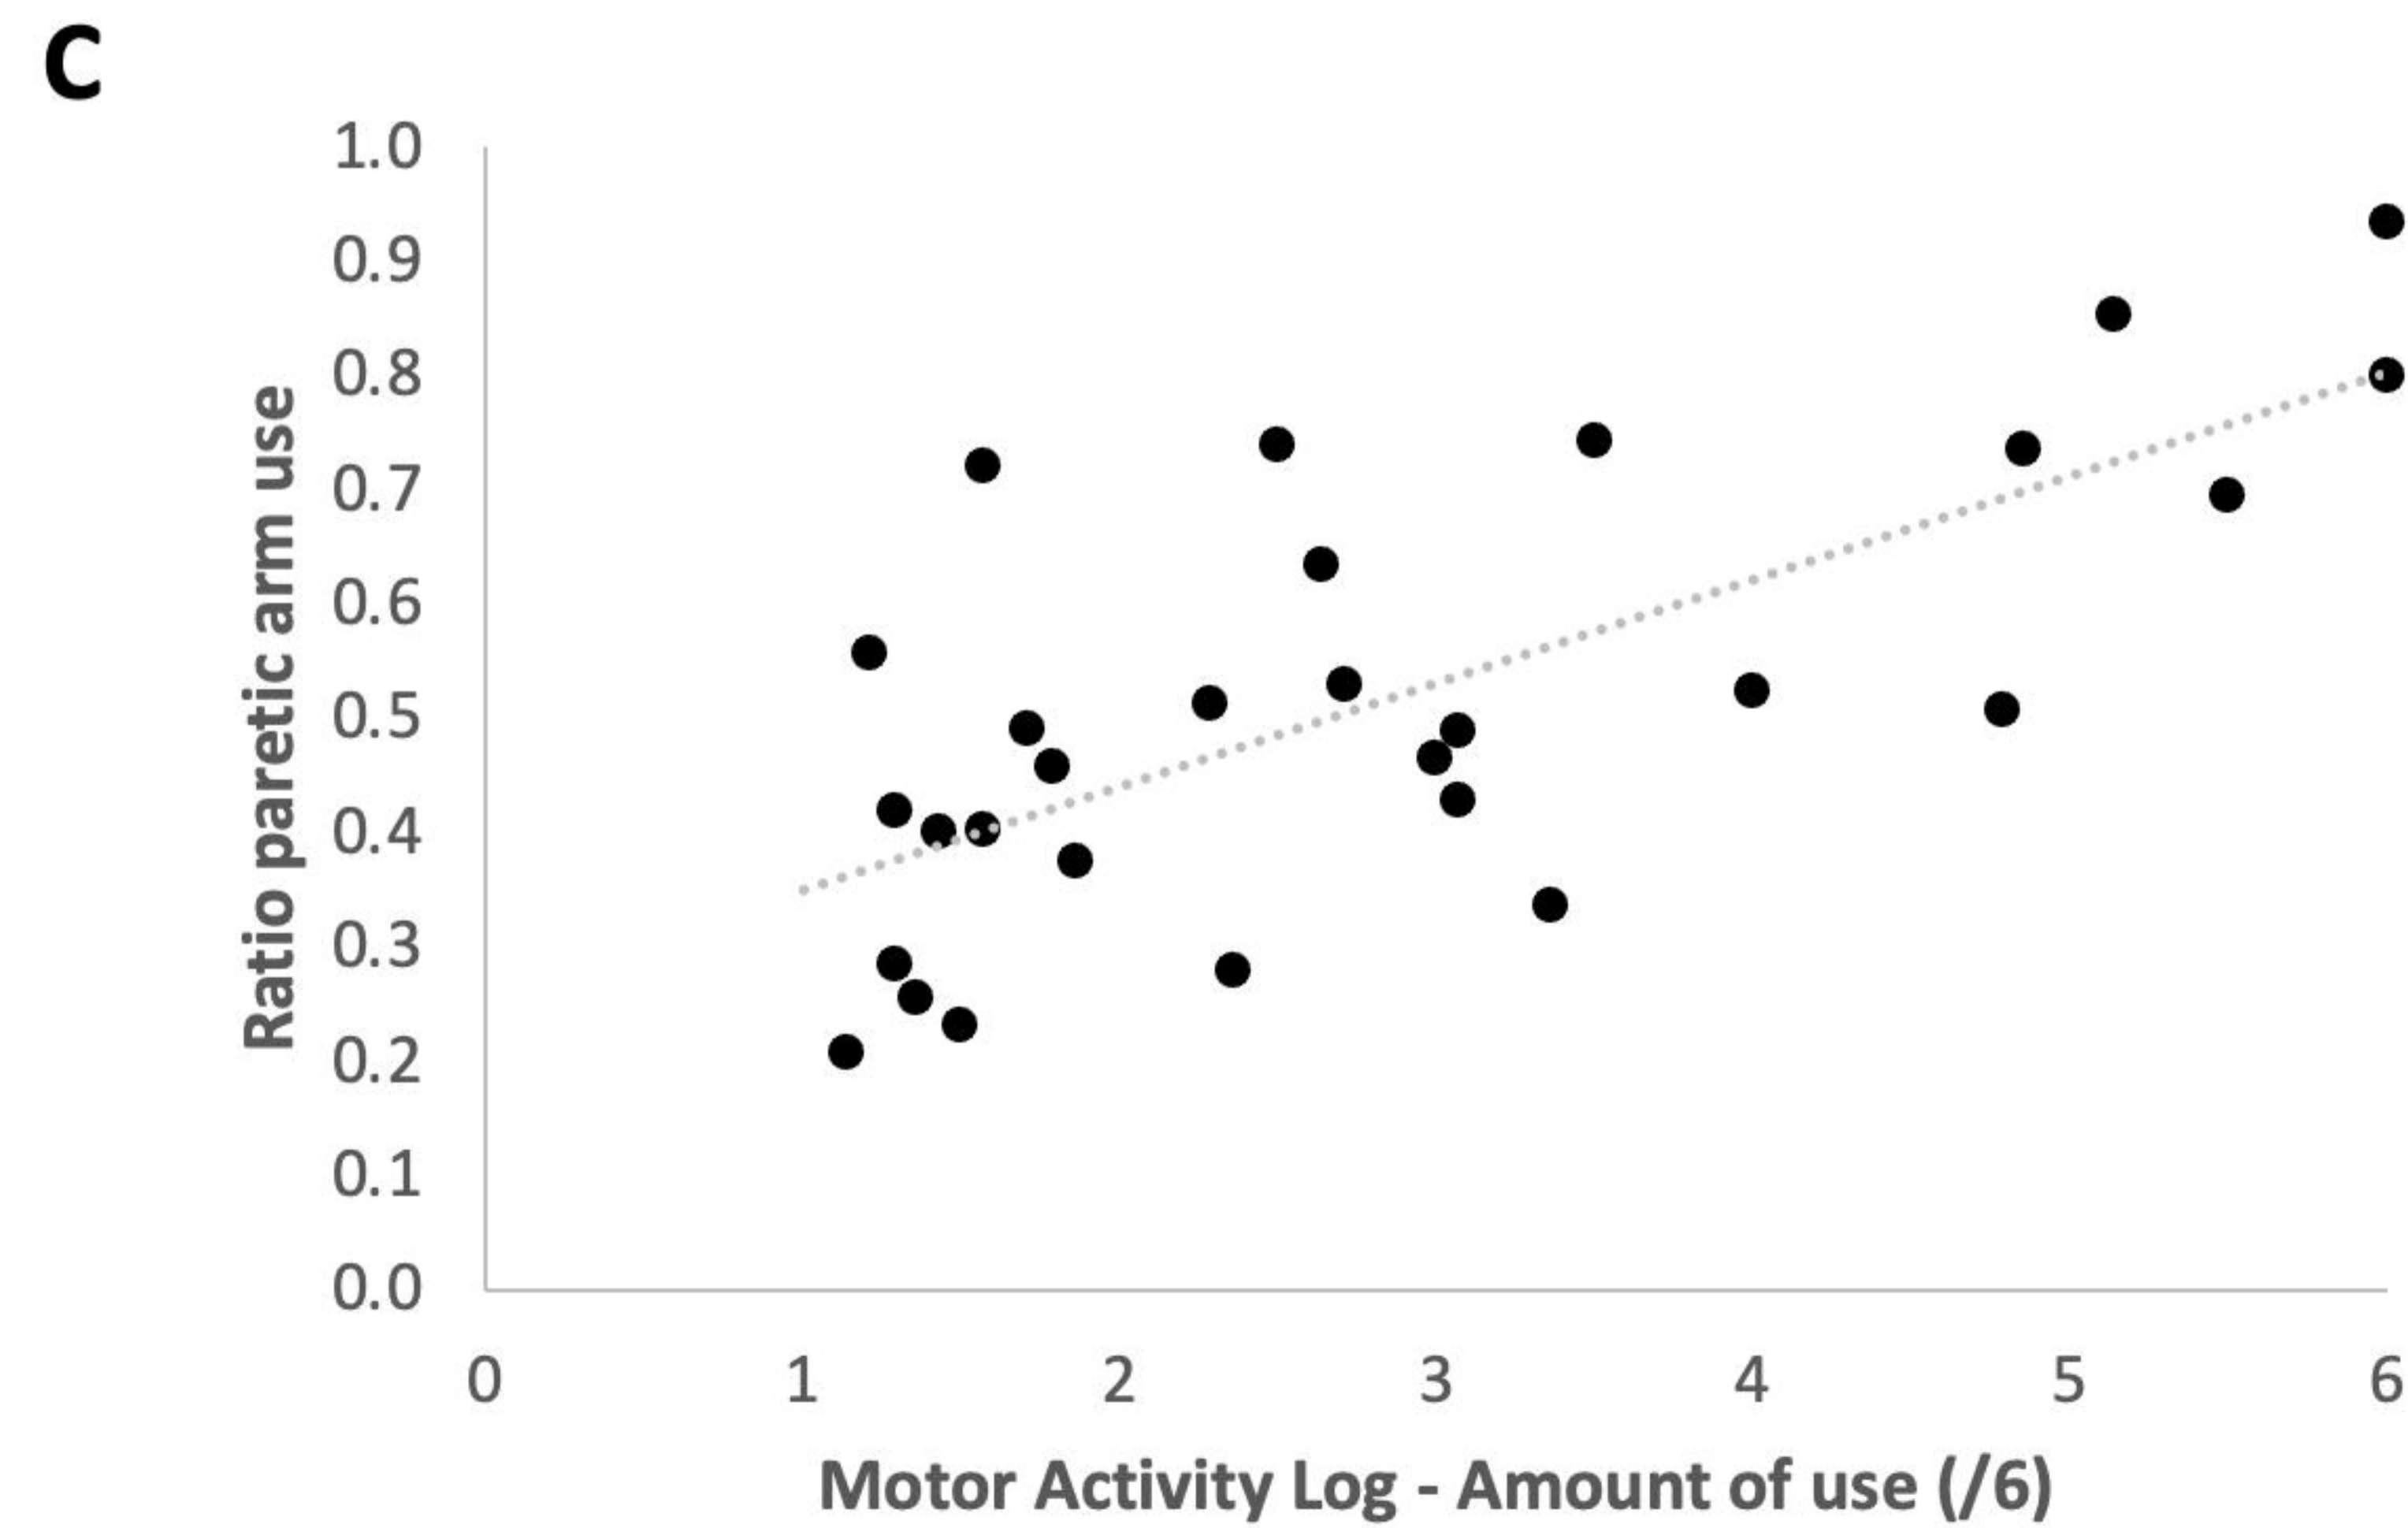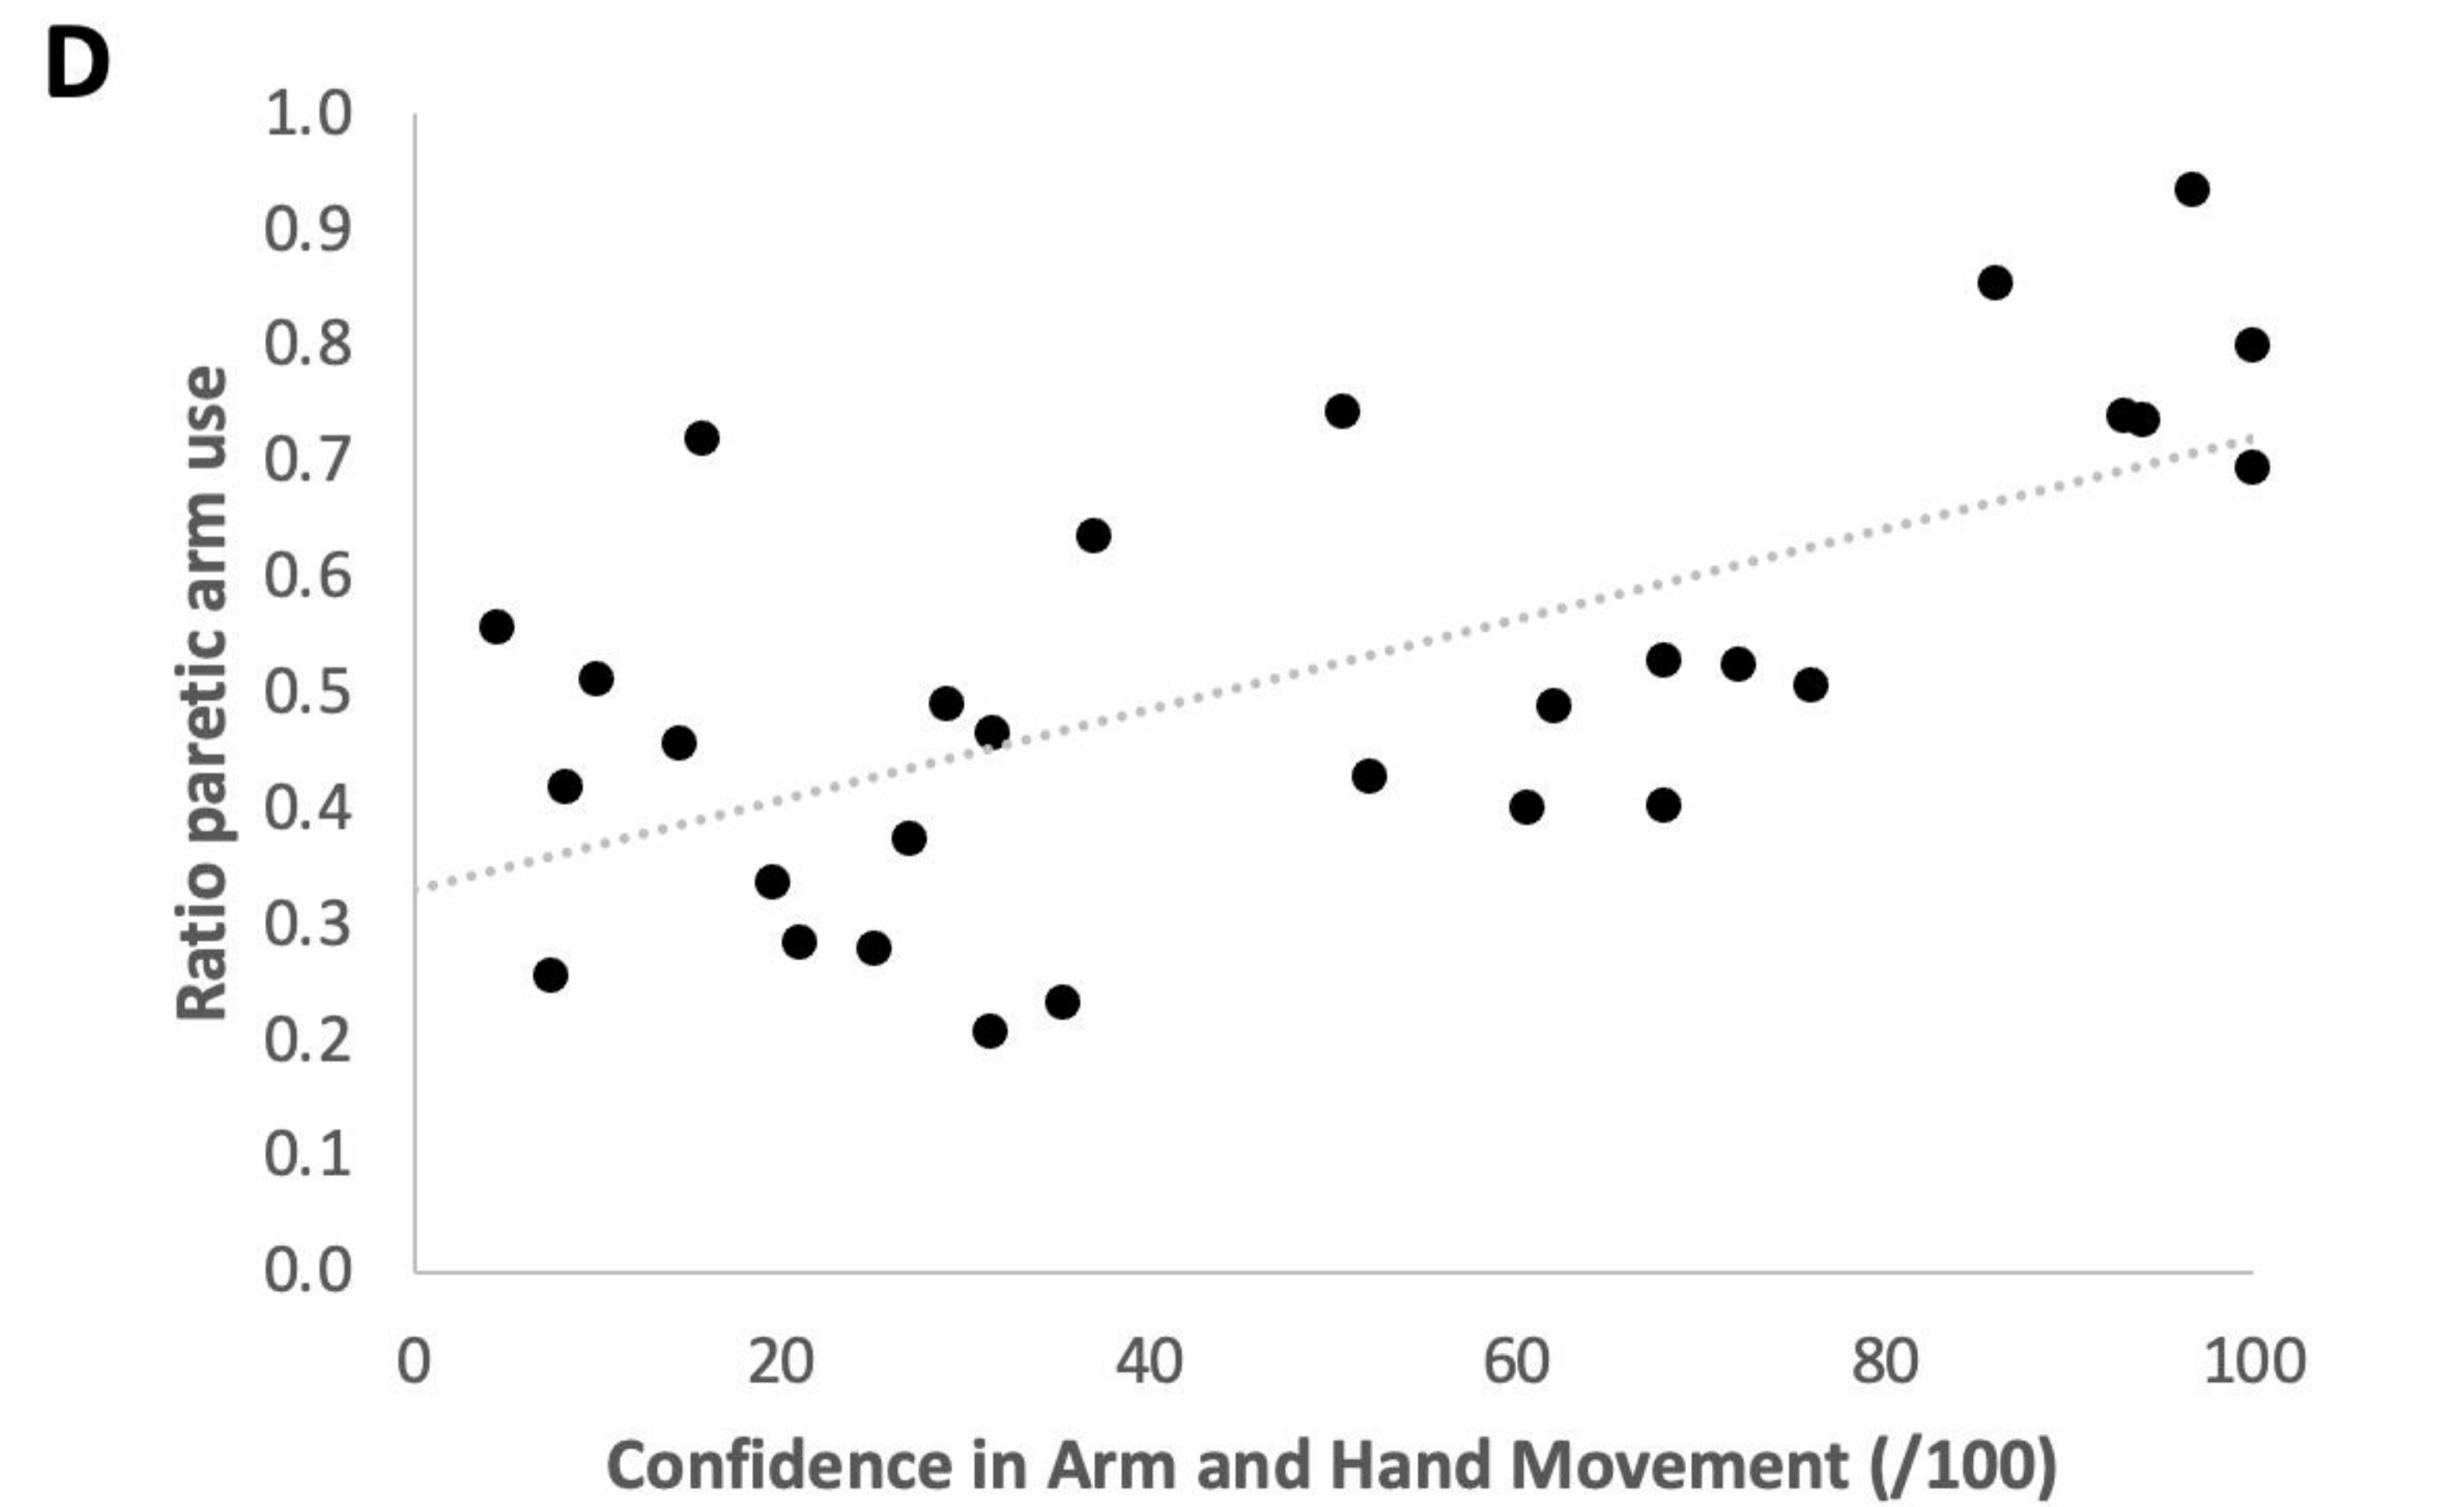

**A**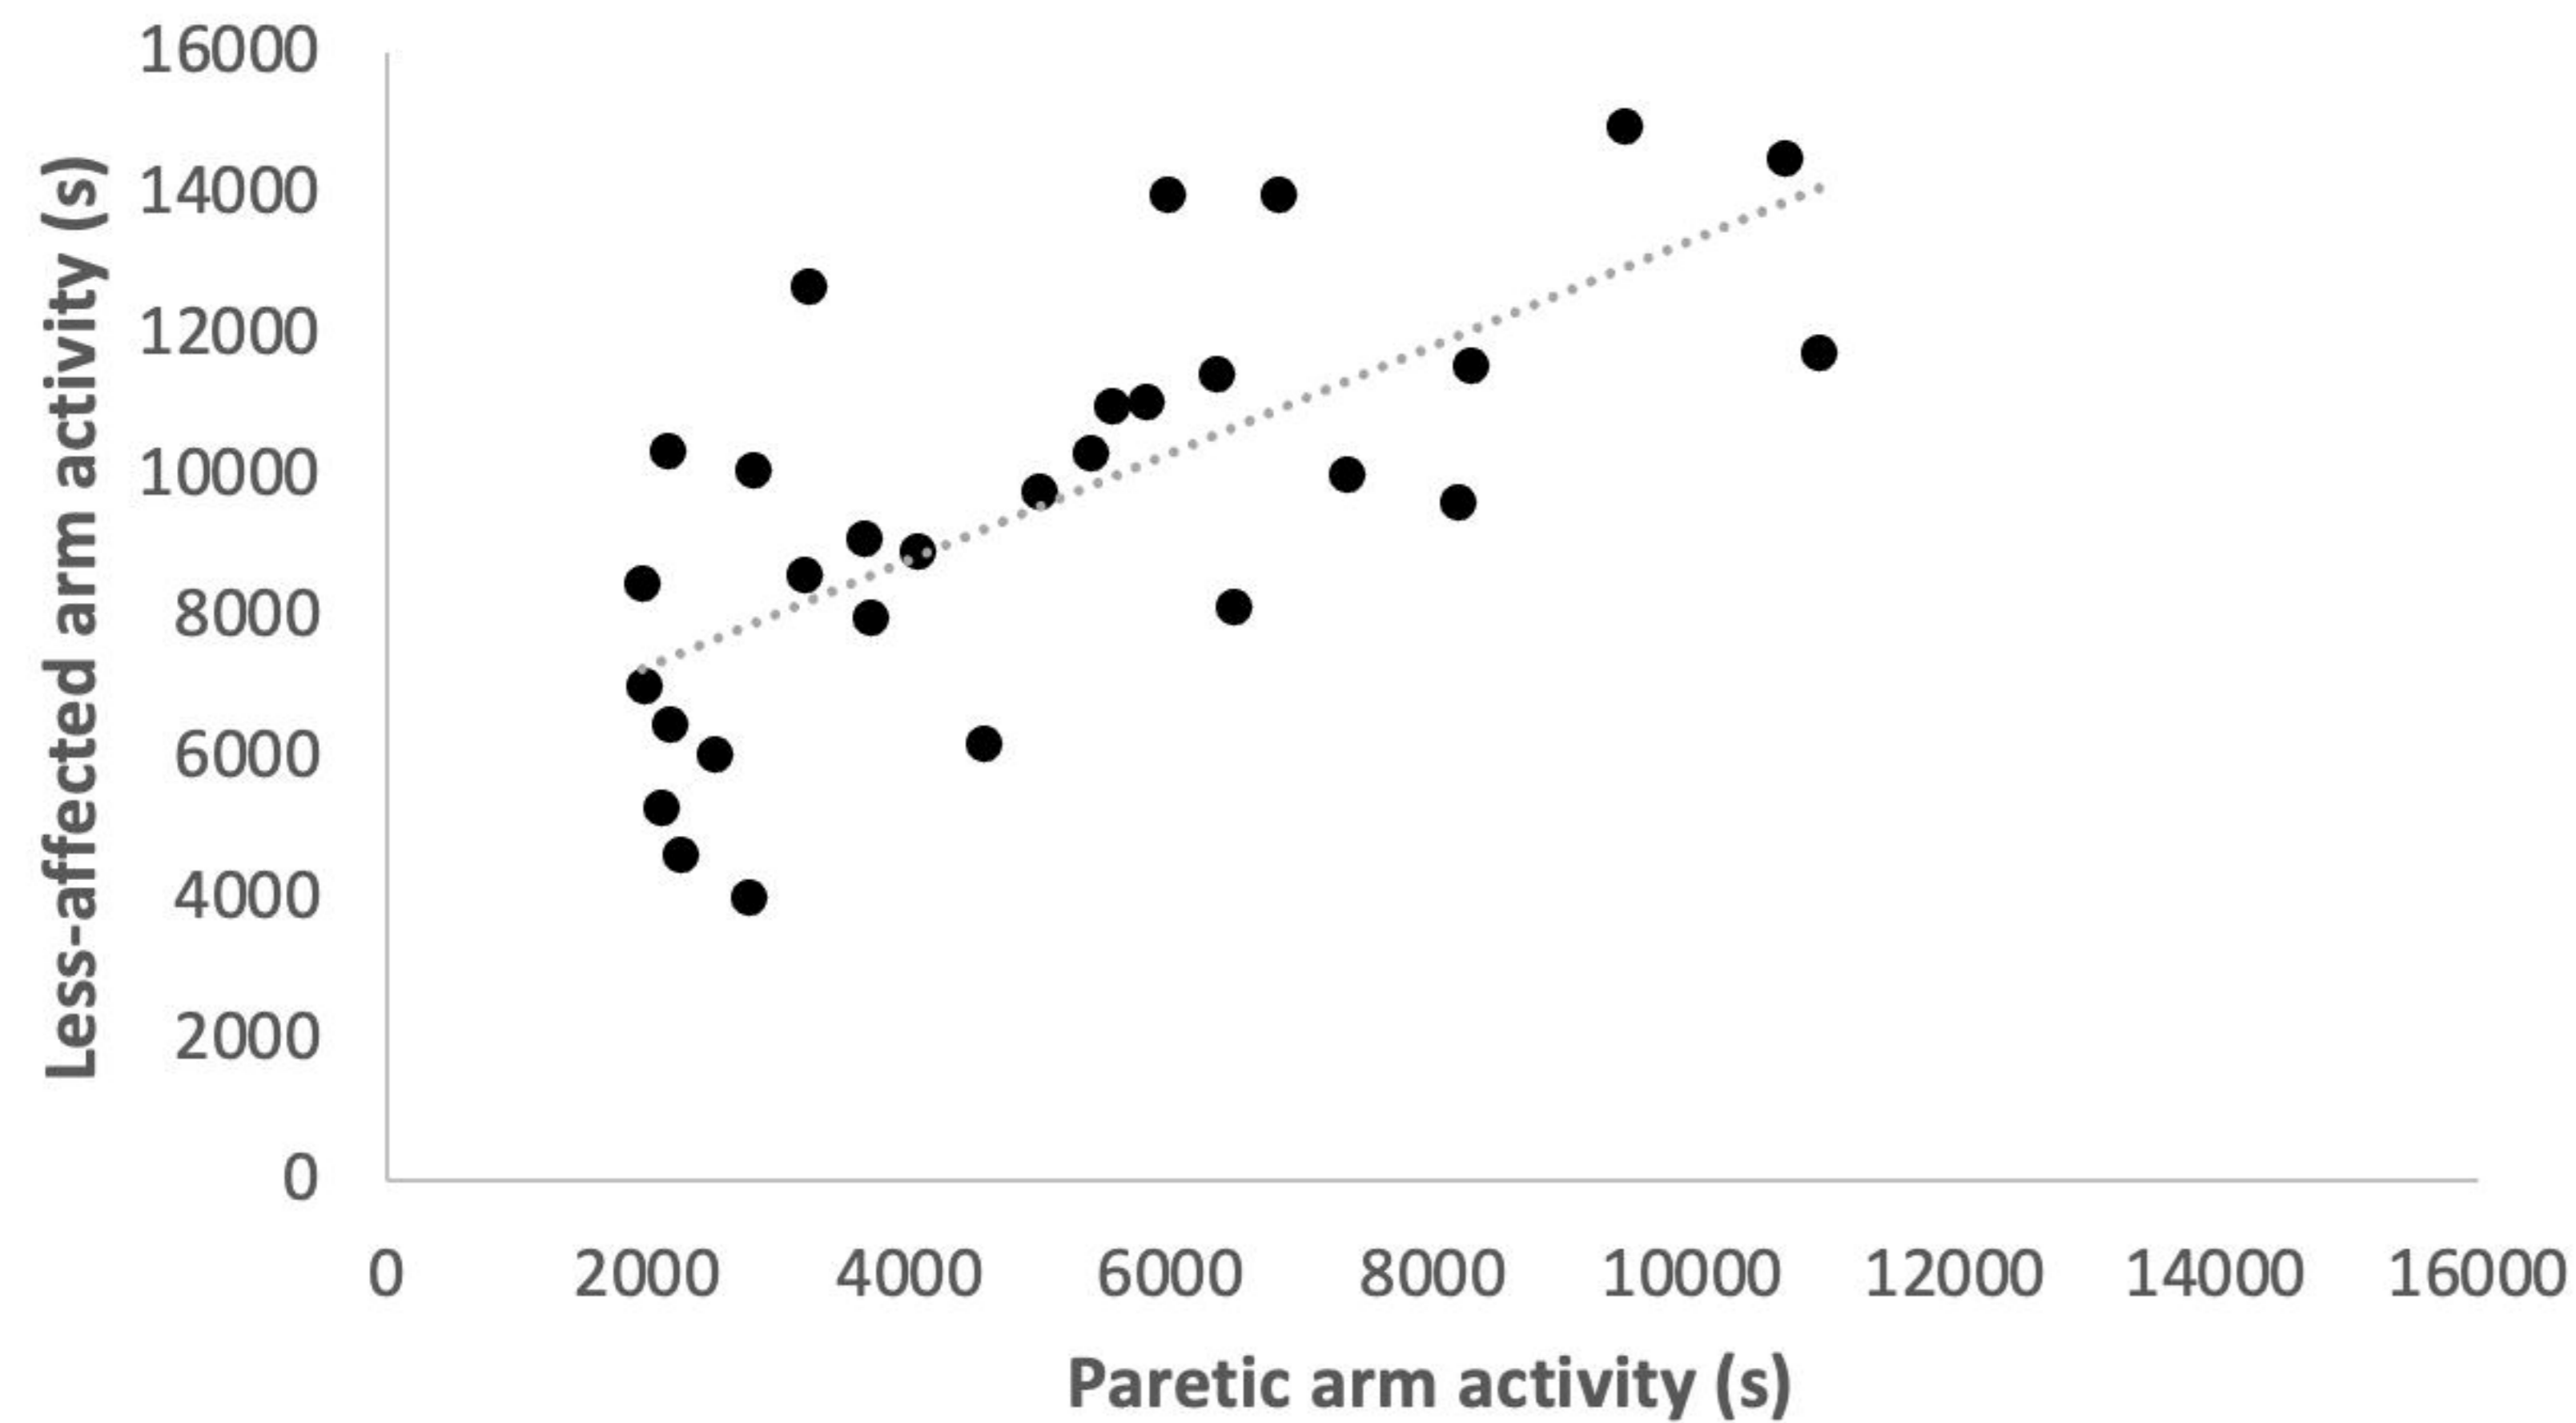**B**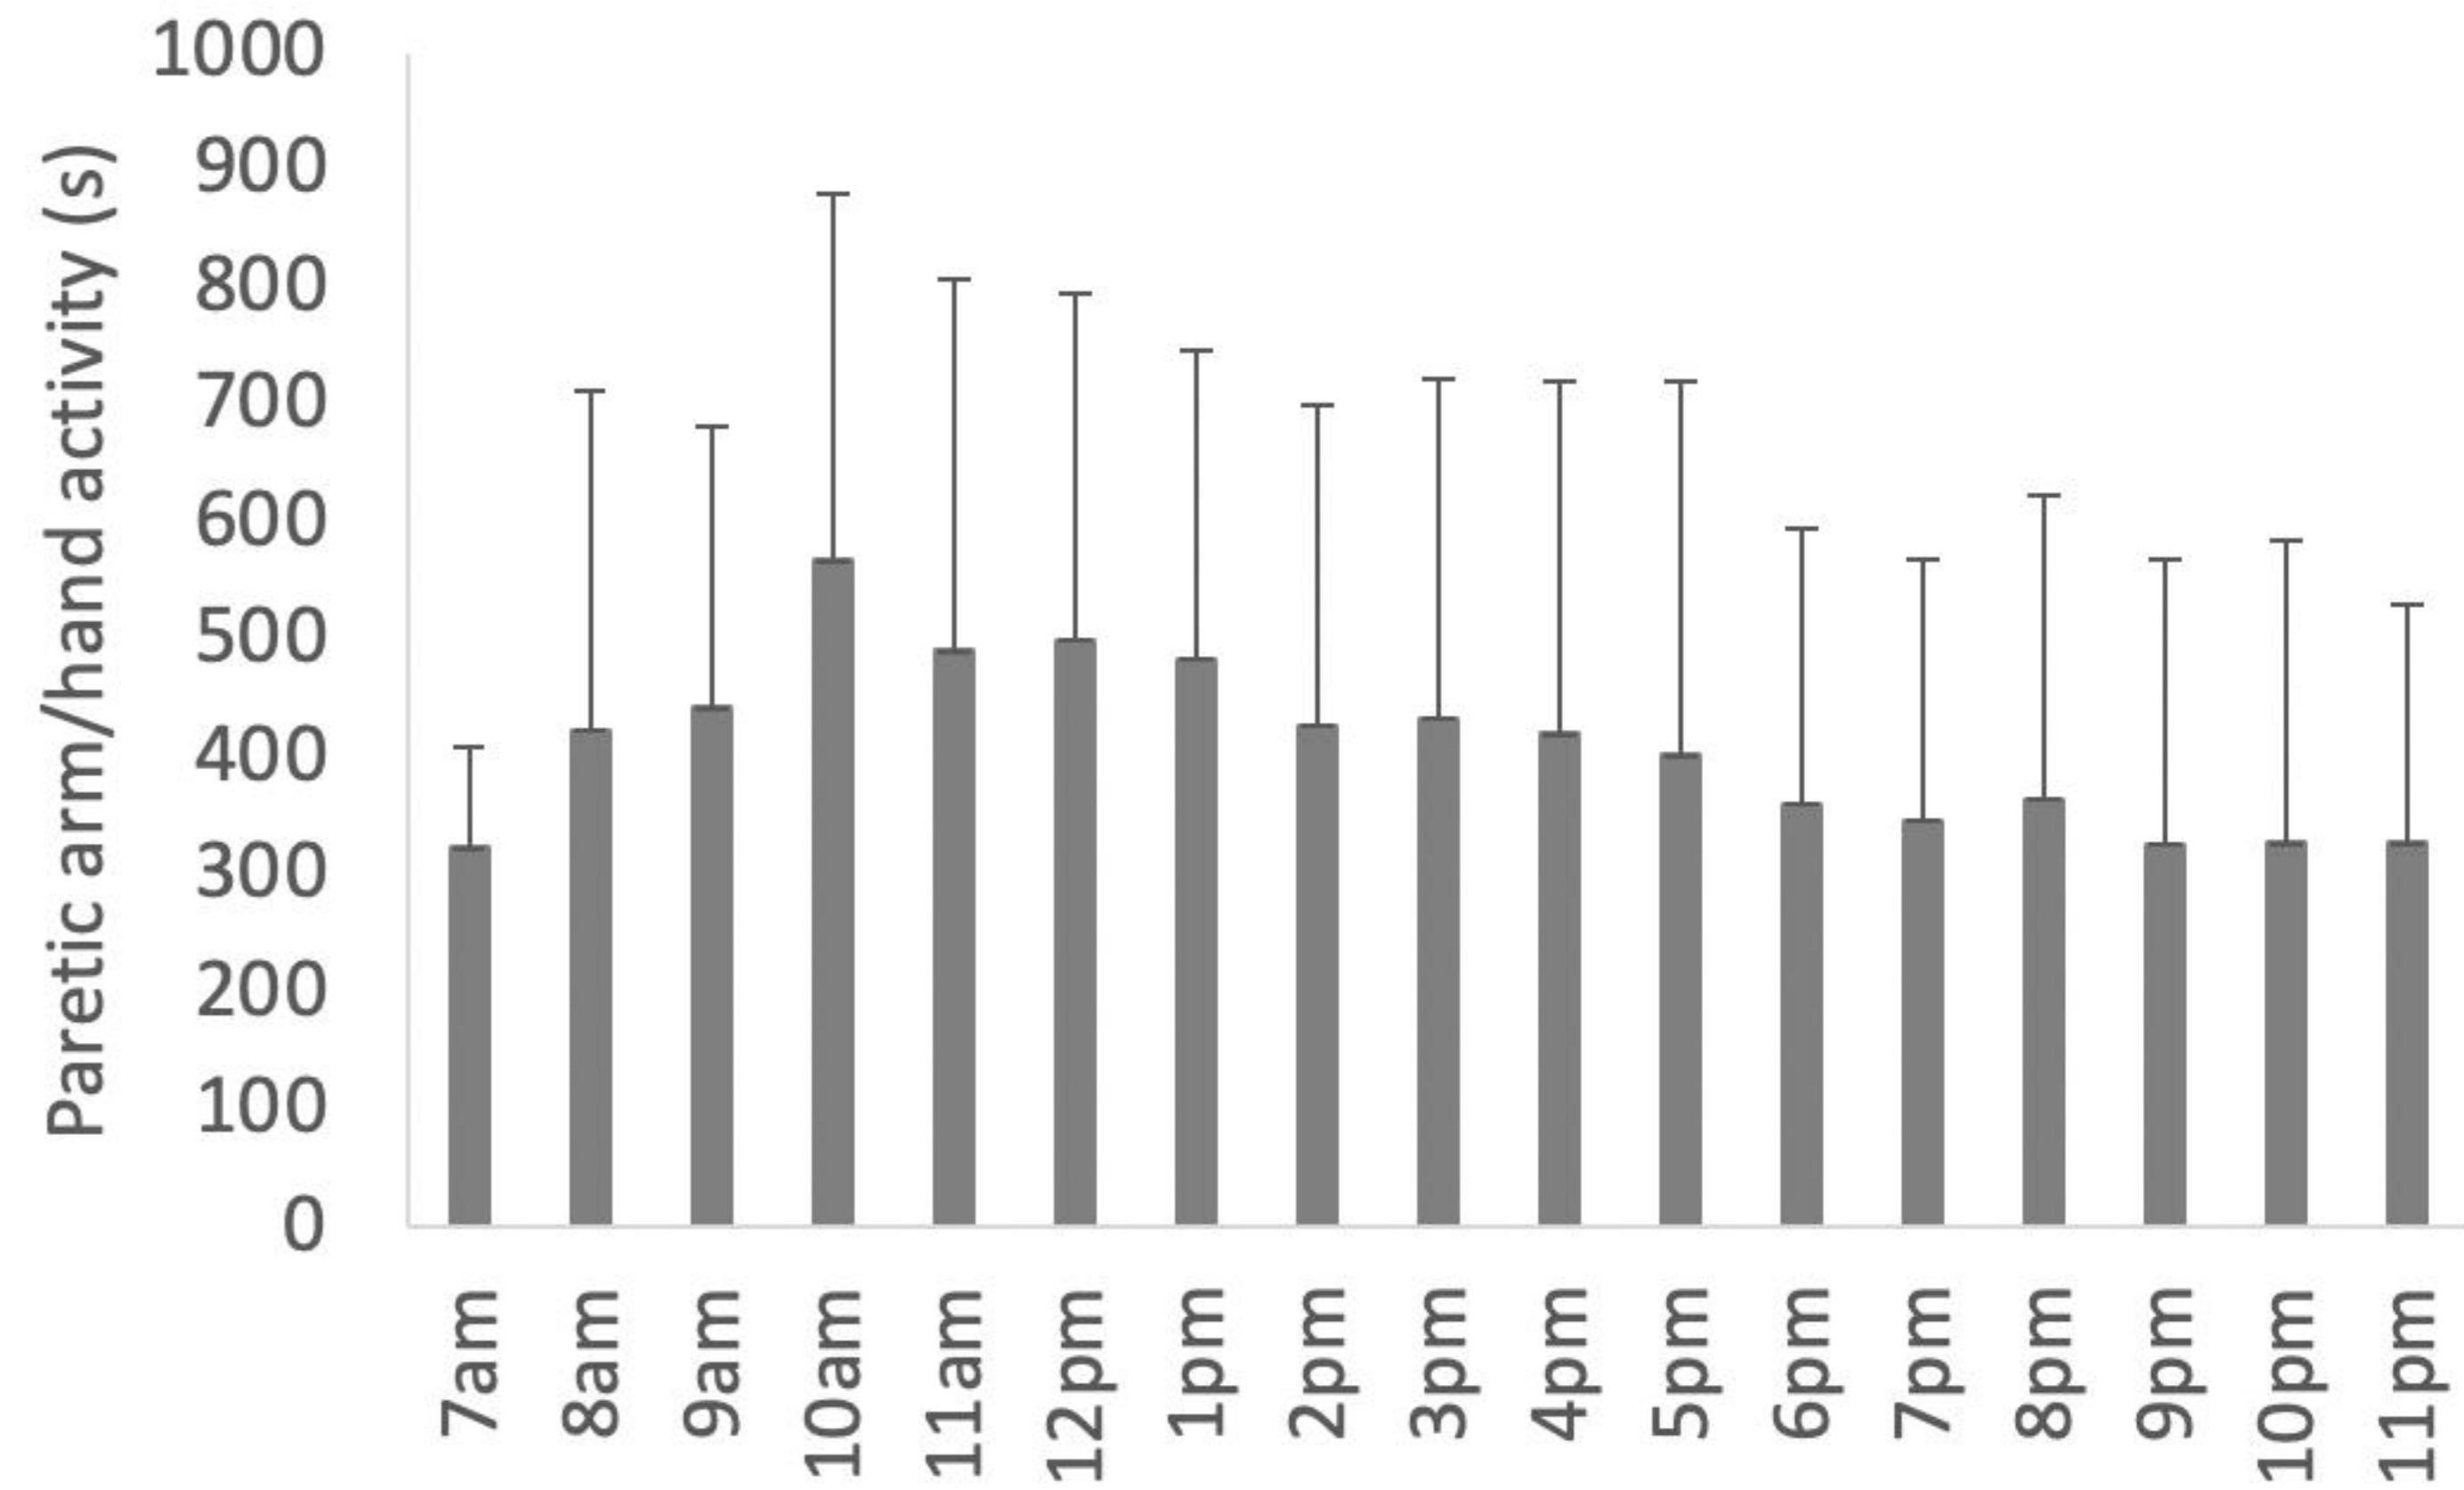

Source: https://www.medrxiv.org/content/10.1101/2023.01.25.23284790v2.full.pdf
